# Supplementary material for: Developing an Approach for Equitable and Reasonable Utilization of International Rivers: The Nile River
Source: MDPI journal article supplement (doi:10.3390/w15244312), 2023-12-18
Supplement: s1 [file s1]

**Table S1:** The UNWC Factors and list of indicators adopted from Gari et al (2020)

| Code                                                                                 | Relevant Factors                                                                          | Sub-factors                                                                                             | Indicators                                                                                               | Indicators relationship with allocation                               |                                |
|--------------------------------------------------------------------------------------|-------------------------------------------------------------------------------------------|---------------------------------------------------------------------------------------------------------|----------------------------------------------------------------------------------------------------------|-----------------------------------------------------------------------|--------------------------------|
| F1                                                                                   | Natural features                                                                          | Geography                                                                                               | Basin area in each country [Km <sup>2</sup> ]                                                            | Direct                                                                |                                |
| SF1                                                                                  |                                                                                           |                                                                                                         | The whole area in each country [Km <sup>2</sup> ]                                                        | Direct                                                                |                                |
| SF2                                                                                  |                                                                                           | Hydrography                                                                                             | River length in each country [Km]                                                                        | Direct                                                                |                                |
| SF3                                                                                  |                                                                                           |                                                                                                         | Climate conditions                                                                                       | Köppen Aridity Index in each country                                  | Reverse                        |
| SF4                                                                                  |                                                                                           | Hydrology                                                                                               | Median Drought vulnerability index                                                                       | Direct                                                                |                                |
|                                                                                      |                                                                                           |                                                                                                         | Water-food-energy risk index or [Resilience Index]                                                       | Reverse                                                               |                                |
|                                                                                      |                                                                                           |                                                                                                         | Annual surface water contribution of each countries [Bm <sup>3</sup> /year]                              | Direct                                                                |                                |
|                                                                                      |                                                                                           |                                                                                                         | Water stress index[%] in each country                                                                    | Direct                                                                |                                |
| SF5                                                                                  |                                                                                           | Ecology and Environment                                                                                 | 95% time flow exceeded minimum environmental flow with moderate management class [Mm <sup>3</sup> /year] | Direct                                                                |                                |
|                                                                                      |                                                                                           |                                                                                                         | Total greenhouse gas emissions (kt of CO2 equivalent) in each country                                    | Reverse                                                               |                                |
|                                                                                      | EnvirnomentaI performance index in each country                                           |                                                                                                         | Direct                                                                                                   |                                                                       |                                |
| F2                                                                                   | Social and economic needs of the watercourse States                                       | Economic and trade Status                                                                               | GDP per capita in each country [Current \$]                                                              | Reverse                                                               |                                |
| SF6                                                                                  |                                                                                           |                                                                                                         | Gross National income per capita in each country [\$]                                                    | Reverse                                                               |                                |
|                                                                                      |                                                                                           |                                                                                                         | Exports and imports trade (% of GDP)                                                                     | Reverse                                                               |                                |
|                                                                                      |                                                                                           |                                                                                                         | Income index                                                                                             | Reverse                                                               |                                |
| SF7                                                                                  |                                                                                           | Work employment and vurnerability                                                                       | Unemployment in the basin in each country [%]                                                            | Direct                                                                |                                |
|                                                                                      |                                                                                           |                                                                                                         | Vulnerable employment (% of total employment)                                                            | Direct                                                                |                                |
| SF8                                                                                  |                                                                                           | Social and economic sustainability                                                                      | Population with access to electricity [%]                                                                | Reverse                                                               |                                |
|                                                                                      |                                                                                           |                                                                                                         | Relative significance of hydropower in each Nile basin countries[%]                                      | Direct                                                                |                                |
|                                                                                      |                                                                                           |                                                                                                         | Population using basic drinking-water supply [%]                                                         | Reverse                                                               |                                |
|                                                                                      |                                                                                           |                                                                                                         | People with access to clean cooking [%]                                                                  | Reverse                                                               |                                |
| SF9                                                                                  |                                                                                           | Human development                                                                                       | Water supply and sanitation index                                                                        | Reverse                                                               |                                |
|                                                                                      |                                                                                           |                                                                                                         | Infrastructure development index                                                                         | Reverse                                                               |                                |
|                                                                                      |                                                                                           |                                                                                                         | Human Development Index (HDI) in each country [%]                                                        | Reverse                                                               |                                |
|                                                                                      |                                                                                           |                                                                                                         | SF10                                                                                                     | Poverty status                                                        | Multidimensional Poverty index |
| Population living below income poverty line [%]                                      |                                                                                           | Direct                                                                                                  |                                                                                                          |                                                                       |                                |
| SF11                                                                                 |                                                                                           | Education status                                                                                        | Hunger Index                                                                                             | Direct                                                                |                                |
|                                                                                      |                                                                                           |                                                                                                         | Education index                                                                                          | Reverse                                                               |                                |
|                                                                                      |                                                                                           |                                                                                                         | Health status                                                                                            | Life expectancy Index                                                 | Reverse                        |
| SF12                                                                                 |                                                                                           | Gender status                                                                                           | Gender Development Index (GDI) in each country [%]                                                       | Reverse                                                               |                                |
| The population dependent on the watercourse in each watercourse state                | Existing dependency                                                                       |                                                                                                         | Population in the Nile basin countries [in millions] in 2019                                             | Direct                                                                |                                |
|                                                                                      |                                                                                           |                                                                                                         | Population living in the basin in each country [%]                                                       | Direct                                                                |                                |
|                                                                                      |                                                                                           | Employment in agriculture (% of total employment)                                                       | Direct                                                                                                   |                                                                       |                                |
|                                                                                      |                                                                                           | Employment in marine and inland fisheries [No]                                                          | Direct                                                                                                   |                                                                       |                                |
|                                                                                      |                                                                                           | Agriculture, forestry, and fishing, value added (% of GDP)                                              | Direct                                                                                                   |                                                                       |                                |
|                                                                                      | SF15                                                                                      | Future dependency                                                                                       | Population growth rate [%]                                                                               | Direct                                                                |                                |
|                                                                                      | F4                                                                                        | The effects of the use or uses of the watercourses in one watercourse State on other watercourse states | Effects on land degradation                                                                              | Fertile soil loss by erosion or sediment yield per year [M tons/year] | Direct                         |
|                                                                                      | Effects on water security                                                                 |                                                                                                         |                                                                                                          | Average annual surface water volumetric reliability index [%]         | Reverse                        |
|                                                                                      | SF17                                                                                      |                                                                                                         | Effect on Environment and human being on downstream neighbor                                             | Water quality index                                                   | Direct                         |
|                                                                                      | SF18                                                                                      |                                                                                                         |                                                                                                          |                                                                       |                                |
| F5                                                                                   | Existing and potential uses of the watercourse                                            | Existing uses                                                                                           | Gross Irrigation water demand in each basin countires [Bm3/yr]                                           | Direct                                                                |                                |
| Existing domestic and industrial water demand in each basin countries [Bm3/year]     |                                                                                           |                                                                                                         | Direct                                                                                                   |                                                                       |                                |
| SF19                                                                                 |                                                                                           | Energy Consumption per Capita (Kg of oil equivalent per capita)                                         | Direct                                                                                                   |                                                                       |                                |
|                                                                                      |                                                                                           | Future Uses                                                                                             | Existing Hydropower production in the basin in each country[MW]                                          | Direct                                                                |                                |
| Potential irrigation remaining area in each basin country [ha]                       | Direct                                                                                    |                                                                                                         |                                                                                                          |                                                                       |                                |
| Projected domestic water demand by 2050 in each basin countires [Bm3/year]           | Direct                                                                                    |                                                                                                         |                                                                                                          |                                                                       |                                |
| Remaining potential Hydropower production in the basin in each country[MW]           | Direct                                                                                    |                                                                                                         |                                                                                                          |                                                                       |                                |
| F6                                                                                   | Conservation, protection, development and economy of uses and the costs of measures taken | Environmental Protection and Conservation                                                               | Areas exposed for severe soil erosion in each countrywith a rate of (>80kg/ha/yr) [Km2]                  | Direct                                                                |                                |
| SF21                                                                                 |                                                                                           |                                                                                                         | Wetland area [Km2]                                                                                       | Direct                                                                |                                |
| SF22                                                                                 |                                                                                           |                                                                                                         | Cereal yield (kg per hectare)                                                                            | Direct                                                                |                                |
| SF23                                                                                 |                                                                                           | Economy of uses                                                                                         | Gross investment made on hydraulic stuctures or Dams [million USD]                                       | Direct                                                                |                                |
|                                                                                      |                                                                                           |                                                                                                         | Total agricultural export value (1000)                                                                   | Reverse                                                               |                                |
|                                                                                      |                                                                                           |                                                                                                         | Loss of water by evaporation from dams in each basin countries [BCM/year]                                | Reverse                                                               |                                |
|                                                                                      |                                                                                           |                                                                                                         | Water use efficiency [USD/m3]                                                                            | Direct                                                                |                                |
| F7                                                                                   |                                                                                           | The availability of alternatives, of comparable value                                                   | Alternative sources                                                                                      | Alternative energy source from Solar(both PV and CSP) [TWh/year]      | Reverse                        |
| Alternative energy source from Wind [TWh/year]                                       |                                                                                           |                                                                                                         |                                                                                                          | Reverse                                                               |                                |
| Alternative energy source from Geothermal [MW]                                       |                                                                                           |                                                                                                         |                                                                                                          | Reverse                                                               |                                |
| Alternative energy source from oil [proved oil reserves in thousand million barrels] | Reverse                                                                                   |                                                                                                         |                                                                                                          |                                                                       |                                |
| SF24                                                                                 | Alternative uses and methods                                                              |                                                                                                         | Alternative energy source from natural gas [proved reserves trillion cubic metres]                       | Reverse                                                               |                                |
|                                                                                      |                                                                                           |                                                                                                         | Alternative energy source from generated waste via incineration method [GWh]                             | Reverse                                                               |                                |
|                                                                                      |                                                                                           |                                                                                                         | Total Renewable ground water resource[BCM/yr]                                                            | Reverse                                                               |                                |
|                                                                                      |                                                                                           |                                                                                                         | Average income from Tourism [Million US\$]                                                               | Reverse                                                               |                                |
|                                                                                      |                                                                                           |                                                                                                         | Alternative source of food and income from Livestook resource                                            |                                                                       |                                |
|                                                                                      |                                                                                           |                                                                                                         | Average fish and aquaculture production [ metric ton/yr]                                                 | Reverse                                                               |                                |
| SF25                                                                                 |                                                                                           | Industry value added (%GDP)- including construction industry                                            | Reverse                                                                                                  |                                                                       |                                |
|                                                                                      |                                                                                           | Employment in service provision sector [% of total employment]                                          | Reverse                                                                                                  |                                                                       |                                |

Table S2 Factors weight using Sequential ranking method

| Sequential Ranking<br>weight scenario # | Factors |       |       |       |       |       |       |
|-----------------------------------------|---------|-------|-------|-------|-------|-------|-------|
|                                         | F1      | F2    | F3    | F4    | F5    | F6    | F7    |
| 1                                       | 3.57    | 7.14  | 10.71 | 14.29 | 17.86 | 21.43 | 25.00 |
| 2                                       | 3.57    | 10.71 | 14.29 | 17.86 | 21.43 | 25.00 | 7.14  |
| 3                                       | 3.57    | 14.29 | 17.86 | 21.43 | 25.00 | 7.14  | 10.71 |
| 4                                       | 3.57    | 17.86 | 21.43 | 25.00 | 7.14  | 10.71 | 14.29 |
| 5                                       | 3.57    | 21.43 | 25.00 | 7.14  | 10.71 | 14.29 | 17.86 |
| 6                                       | 3.57    | 25.00 | 7.14  | 10.71 | 14.29 | 17.86 | 21.43 |
| 7                                       | 7.14    | 3.57  | 10.71 | 14.29 | 17.86 | 21.43 | 25.00 |
| 8                                       | 7.14    | 10.71 | 14.29 | 17.86 | 21.43 | 25.00 | 3.57  |
| 9                                       | 7.14    | 14.29 | 17.86 | 21.43 | 25.00 | 3.57  | 10.71 |
| 10                                      | 7.14    | 17.86 | 21.43 | 25.00 | 3.57  | 10.71 | 14.29 |
| 11                                      | 7.14    | 21.43 | 25.00 | 3.57  | 10.71 | 14.29 | 17.86 |
| 12                                      | 7.14    | 25.00 | 3.57  | 10.71 | 14.29 | 17.86 | 21.43 |
| 13                                      | 10.71   | 3.57  | 7.14  | 14.29 | 17.86 | 21.43 | 25.00 |
| 14                                      | 10.71   | 7.14  | 14.29 | 17.86 | 21.43 | 25.00 | 3.57  |
| 15                                      | 10.71   | 14.29 | 17.86 | 21.43 | 25.00 | 3.57  | 7.14  |
| 16                                      | 10.71   | 17.86 | 21.43 | 25.00 | 3.57  | 7.14  | 14.29 |
| 17                                      | 10.71   | 21.43 | 25.00 | 3.57  | 7.14  | 14.29 | 17.86 |
| 18                                      | 10.71   | 25.00 | 3.57  | 7.14  | 14.29 | 17.86 | 21.43 |
| 19                                      | 14.29   | 3.57  | 7.14  | 10.71 | 17.86 | 21.43 | 25.00 |
| 20                                      | 14.29   | 7.14  | 10.71 | 17.86 | 21.43 | 25.00 | 3.57  |
| 21                                      | 14.29   | 10.71 | 17.86 | 21.43 | 25.00 | 3.57  | 7.14  |
| 22                                      | 14.29   | 17.86 | 21.43 | 25.00 | 3.57  | 7.14  | 10.71 |
| 23                                      | 14.29   | 21.43 | 25.00 | 3.57  | 7.14  | 10.71 | 17.86 |
| 24                                      | 14.29   | 25.00 | 3.57  | 7.14  | 10.71 | 17.86 | 21.43 |
| 25                                      | 17.86   | 3.57  | 7.14  | 10.71 | 14.29 | 21.43 | 25.00 |
| 26                                      | 17.86   | 7.14  | 10.71 | 14.29 | 21.43 | 25.00 | 3.57  |
| 27                                      | 17.86   | 10.71 | 14.29 | 21.43 | 25.00 | 3.57  | 7.14  |
| 28                                      | 17.86   | 14.29 | 21.43 | 25.00 | 3.57  | 7.14  | 10.71 |
| 29                                      | 17.86   | 21.43 | 25.00 | 3.57  | 7.14  | 10.71 | 14.29 |
| 30                                      | 17.86   | 25.00 | 3.57  | 7.14  | 10.71 | 14.29 | 21.43 |
| 31                                      | 21.43   | 3.57  | 7.14  | 10.71 | 14.29 | 17.86 | 25.00 |
| 32                                      | 21.43   | 7.14  | 10.71 | 14.29 | 17.86 | 25.00 | 3.57  |
| 33                                      | 21.43   | 10.71 | 14.29 | 17.86 | 25.00 | 3.57  | 7.14  |
| 34                                      | 21.43   | 14.29 | 17.86 | 25.00 | 3.57  | 7.14  | 10.71 |
| 35                                      | 21.43   | 17.86 | 25.00 | 3.57  | 7.14  | 10.71 | 14.29 |
| 36                                      | 21.43   | 25.00 | 3.57  | 7.14  | 10.71 | 14.29 | 17.86 |
| 37                                      | 25.00   | 3.57  | 7.14  | 10.71 | 14.29 | 17.86 | 21.43 |
| 38                                      | 25.00   | 7.14  | 10.71 | 14.29 | 17.86 | 21.43 | 3.57  |
| 39                                      | 25.00   | 10.71 | 14.29 | 17.86 | 21.43 | 3.57  | 7.14  |
| 40                                      | 25.00   | 14.29 | 17.86 | 21.43 | 3.57  | 7.14  | 10.71 |
| 41                                      | 25.00   | 17.86 | 21.43 | 3.57  | 7.14  | 10.71 | 14.29 |
| 42                                      | 25.00   | 21.43 | 3.57  | 7.14  | 10.71 | 14.29 | 17.86 |

**Table S3:** Weight scenarios in which Factors were weighted by FAHP, Equal and sequential ranking method, and sub-factors and indicators weight is distributed equally

| Factor # | Relevant factors and Sub-Factors | Indicators | Weights of Factors, Sub factors and indicators using different approach (%) |        |                             |       |       |       |       |       |       |       |       |        |        |        |        |        |        |        |        |        |        |        |        |        |        |        |        |        |        |        |        |        |        |        |        |        |        |        |        |        |        |        |        |        |       |       |       |       |       |       |       |       |       |       |       |       |       |       |       |       |       |       |       |       |       |       |       |       |       |       |       |       |       |       |       |       |       |       |       |       |       |       |       |       |       |       |       |       |       |       |       |       |       |       |       |       |       |       |       |       |       |       |       |       |       |       |       |       |       |       |       |       |       |       |       |       |       |       |       |       |       |       |       |       |       |       |       |       |       |       |       |       |       |       |       |       |       |       |       |       |       |       |       |       |       |       |       |       |       |       |       |       |       |       |       |       |       |       |       |       |       |       |       |       |       |       |       |       |       |       |       |       |       |       |       |       |       |       |       |       |       |       |       |       |       |       |       |       |       |       |       |       |       |       |       |       |       |       |       |       |       |       |       |       |       |       |       |       |       |       |       |       |       |       |       |       |       |       |       |       |       |       |       |       |       |       |       |       |       |       |       |       |       |       |       |       |       |       |       |       |       |       |       |       |       |       |       |       |       |       |       |       |       |       |       |       |       |       |       |       |       |       |       |       |       |       |       |       |       |       |       |       |       |       |       |       |       |       |       |       |       |       |       |       |       |       |       |       |       |       |       |       |       |       |       |       |       |       |       |       |       |       |       |       |       |       |       |       |       |       |       |       |       |       |       |       |       |       |       |       |       |       |       |       |       |       |       |       |       |       |       |       |       |       |       |       |       |       |       |       |       |       |       |       |       |       |       |       |       |       |       |       |       |       |       |       |       |       |       |       |       |       |       |       |       |       |       |       |       |       |       |       |       |       |       |       |       |       |       |       |       |       |       |       |       |       |       |       |       |       |       |       |       |       |       |       |       |       |       |       |       |       |       |       |       |       |       |       |       |       |       |       |       |       |       |       |       |       |       |       |       |       |       |       |       |       |       |       |       |       |       |       |       |       |       |       |       |       |       |       |       |       |       |       |       |       |       |       |       |       |       |       |       |       |       |       |       |       |       |       |       |       |       |       |       |       |       |       |       |       |       |       |       |       |       |       |       |       |       |       |       |       |       |       |       |       |       |       |       |       |       |       |       |       |       |       |       |       |       |       |       |       |       |       |       |       |       |       |       |       |       |       |       |       |       |       |       |       |       |       |       |       |       |       |       |       |       |       |       |       |       |       |       |       |       |       |       |       |       |       |       |       |       |       |       |       |       |       |       |       |       |       |       |       |       |       |       |       |       |       |       |       |       |       |       |       |       |       |       |       |       |       |       |       |       |       |       |       |       |       |       |       |       |       |       |       |       |       |       |       |       |       |       |       |       |       |       |       |       |       |       |       |       |       |       |       |       |       |       |       |       |       |       |       |       |       |       |       |       |       |       |       |       |       |       |       |       |       |       |       |       |       |       |       |       |       |       |       |       |       |       |       |       |       |       |       |       |       |       |       |       |       |       |       |       |       |       |       |       |       |       |       |       |       |       |       |       |       |       |       |       |       |       |       |       |       |       |       |       |       |       |       |       |       |       |       |       |       |       |       |       |       |       |       |       |       |       |       |       |       |       |       |       |       |       |       |       |       |       |       |       |       |       |       |       |       |       |       |       |       |       |       |       |       |       |       |       |       |       |       |       |       |       |       |       |       |       |       |       |       |       |       |       |       |       |       |       |       |       |       |       |       |       |       |       |       |       |       |       |       |       |       |       |       |       |       |       |       |       |       |       |       |       |       |       |       |       |       |       |       |       |       |       |       |       |       |       |       |       |       |       |       |       |       |       |       |       |       |       |       |       |       |       |       |       |       |
|----------|----------------------------------|------------|-----------------------------------------------------------------------------|--------|-----------------------------|-------|-------|-------|-------|-------|-------|-------|-------|--------|--------|--------|--------|--------|--------|--------|--------|--------|--------|--------|--------|--------|--------|--------|--------|--------|--------|--------|--------|--------|--------|--------|--------|--------|--------|--------|--------|--------|--------|--------|--------|--------|-------|-------|-------|-------|-------|-------|-------|-------|-------|-------|-------|-------|-------|-------|-------|-------|-------|-------|-------|-------|-------|-------|-------|-------|-------|-------|-------|-------|-------|-------|-------|-------|-------|-------|-------|-------|-------|-------|-------|-------|-------|-------|-------|-------|-------|-------|-------|-------|-------|-------|-------|-------|-------|-------|-------|-------|-------|-------|-------|-------|-------|-------|-------|-------|-------|-------|-------|-------|-------|-------|-------|-------|-------|-------|-------|-------|-------|-------|-------|-------|-------|-------|-------|-------|-------|-------|-------|-------|-------|-------|-------|-------|-------|-------|-------|-------|-------|-------|-------|-------|-------|-------|-------|-------|-------|-------|-------|-------|-------|-------|-------|-------|-------|-------|-------|-------|-------|-------|-------|-------|-------|-------|-------|-------|-------|-------|-------|-------|-------|-------|-------|-------|-------|-------|-------|-------|-------|-------|-------|-------|-------|-------|-------|-------|-------|-------|-------|-------|-------|-------|-------|-------|-------|-------|-------|-------|-------|-------|-------|-------|-------|-------|-------|-------|-------|-------|-------|-------|-------|-------|-------|-------|-------|-------|-------|-------|-------|-------|-------|-------|-------|-------|-------|-------|-------|-------|-------|-------|-------|-------|-------|-------|-------|-------|-------|-------|-------|-------|-------|-------|-------|-------|-------|-------|-------|-------|-------|-------|-------|-------|-------|-------|-------|-------|-------|-------|-------|-------|-------|-------|-------|-------|-------|-------|-------|-------|-------|-------|-------|-------|-------|-------|-------|-------|-------|-------|-------|-------|-------|-------|-------|-------|-------|-------|-------|-------|-------|-------|-------|-------|-------|-------|-------|-------|-------|-------|-------|-------|-------|-------|-------|-------|-------|-------|-------|-------|-------|-------|-------|-------|-------|-------|-------|-------|-------|-------|-------|-------|-------|-------|-------|-------|-------|-------|-------|-------|-------|-------|-------|-------|-------|-------|-------|-------|-------|-------|-------|-------|-------|-------|-------|-------|-------|-------|-------|-------|-------|-------|-------|-------|-------|-------|-------|-------|-------|-------|-------|-------|-------|-------|-------|-------|-------|-------|-------|-------|-------|-------|-------|-------|-------|-------|-------|-------|-------|-------|-------|-------|-------|-------|-------|-------|-------|-------|-------|-------|-------|-------|-------|-------|-------|-------|-------|-------|-------|-------|-------|-------|-------|-------|-------|-------|-------|-------|-------|-------|-------|-------|-------|-------|-------|-------|-------|-------|-------|-------|-------|-------|-------|-------|-------|-------|-------|-------|-------|-------|-------|-------|-------|-------|-------|-------|-------|-------|-------|-------|-------|-------|-------|-------|-------|-------|-------|-------|-------|-------|-------|-------|-------|-------|-------|-------|-------|-------|-------|-------|-------|-------|-------|-------|-------|-------|-------|-------|-------|-------|-------|-------|-------|-------|-------|-------|-------|-------|-------|-------|-------|-------|-------|-------|-------|-------|-------|-------|-------|-------|-------|-------|-------|-------|-------|-------|-------|-------|-------|-------|-------|-------|-------|-------|-------|-------|-------|-------|-------|-------|-------|-------|-------|-------|-------|-------|-------|-------|-------|-------|-------|-------|-------|-------|-------|-------|-------|-------|-------|-------|-------|-------|-------|-------|-------|-------|-------|-------|-------|-------|-------|-------|-------|-------|-------|-------|-------|-------|-------|-------|-------|-------|-------|-------|-------|-------|-------|-------|-------|-------|-------|-------|-------|-------|-------|-------|-------|-------|-------|-------|-------|-------|-------|-------|-------|-------|-------|-------|-------|-------|-------|-------|-------|-------|-------|-------|-------|-------|-------|-------|-------|-------|-------|-------|-------|-------|-------|-------|-------|-------|-------|-------|-------|-------|-------|-------|-------|-------|-------|-------|-------|-------|-------|-------|-------|-------|-------|-------|-------|-------|-------|-------|-------|-------|-------|-------|-------|-------|-------|-------|-------|-------|-------|-------|-------|-------|-------|-------|-------|-------|-------|-------|-------|-------|-------|-------|-------|-------|-------|-------|-------|-------|-------|-------|-------|-------|-------|-------|-------|-------|-------|-------|-------|-------|-------|-------|-------|-------|-------|-------|-------|-------|-------|-------|-------|-------|-------|-------|-------|-------|-------|-------|-------|-------|-------|-------|-------|-------|-------|-------|-------|-------|-------|-------|-------|-------|-------|-------|-------|-------|-------|-------|-------|-------|-------|-------|-------|-------|-------|-------|-------|-------|-------|-------|-------|-------|-------|-------|-------|-------|-------|-------|-------|-------|-------|-------|-------|-------|-------|-------|-------|-------|-------|-------|-------|-------|-------|-------|-------|-------|-------|-------|-------|-------|-------|-------|-------|-------|-------|-------|-------|-------|-------|-------|-------|-------|-------|-------|-------|-------|-------|-------|-------|-------|-------|-------|-------|-------|-------|-------|-------|-------|-------|-------|-------|-------|-------|-------|-------|-------|-------|-------|-------|-------|-------|-------|-------|-------|-------|-------|-------|-------|-------|-------|-------|-------|-------|-------|-------|-------|-------|-------|-------|-------|-------|-------|
|          |                                  |            | FAHP                                                                        | Equal  | Sequential Ranking approach |       |       |       |       |       |       |       |       |        |        |        |        |        |        |        |        |        |        |        |        |        |        |        |        |        |        |        |        |        |        |        |        |        |        |        |        |        |        |        |        |        |       |       |       |       |       |       |       |       |       |       |       |       |       |       |       |       |       |       |       |       |       |       |       |       |       |       |       |       |       |       |       |       |       |       |       |       |       |       |       |       |       |       |       |       |       |       |       |       |       |       |       |       |       |       |       |       |       |       |       |       |       |       |       |       |       |       |       |       |       |       |       |       |       |       |       |       |       |       |       |       |       |       |       |       |       |       |       |       |       |       |       |       |       |       |       |       |       |       |       |       |       |       |       |       |       |       |       |       |       |       |       |       |       |       |       |       |       |       |       |       |       |       |       |       |       |       |       |       |       |       |       |       |       |       |       |       |       |       |       |       |       |       |       |       |       |       |       |       |       |       |       |       |       |       |       |       |       |       |       |       |       |       |       |       |       |       |       |       |       |       |       |       |       |       |       |       |       |       |       |       |       |       |       |       |       |       |       |       |       |       |       |       |       |       |       |       |       |       |       |       |       |       |       |       |       |       |       |       |       |       |       |       |       |       |       |       |       |       |       |       |       |       |       |       |       |       |       |       |       |       |       |       |       |       |       |       |       |       |       |       |       |       |       |       |       |       |       |       |       |       |       |       |       |       |       |       |       |       |       |       |       |       |       |       |       |       |       |       |       |       |       |       |       |       |       |       |       |       |       |       |       |       |       |       |       |       |       |       |       |       |       |       |       |       |       |       |       |       |       |       |       |       |       |       |       |       |       |       |       |       |       |       |       |       |       |       |       |       |       |       |       |       |       |       |       |       |       |       |       |       |       |       |       |       |       |       |       |       |       |       |       |       |       |       |       |       |       |       |       |       |       |       |       |       |       |       |       |       |       |       |       |       |       |       |       |       |       |       |       |       |       |       |       |       |       |       |       |       |       |       |       |       |       |       |       |       |       |       |       |       |       |       |       |       |       |       |       |       |       |       |       |       |       |       |       |       |       |       |       |       |       |       |       |       |       |       |       |       |       |       |       |       |       |       |       |       |       |       |       |       |       |       |       |       |       |       |       |       |       |       |       |       |       |       |       |       |       |       |       |       |       |       |       |       |       |       |       |       |       |       |       |       |       |       |       |       |       |       |       |       |       |       |       |       |       |       |       |       |       |       |       |       |       |       |       |       |       |       |       |       |       |       |       |       |       |       |       |       |       |       |       |       |       |       |       |       |       |       |       |       |       |       |       |       |       |       |       |       |       |       |       |       |       |       |       |       |       |       |       |       |       |       |       |       |       |       |       |       |       |       |       |       |       |       |       |       |       |       |       |       |       |       |       |       |       |       |       |       |       |       |       |       |       |       |       |       |       |       |       |       |       |       |       |       |       |       |       |       |       |       |       |       |       |       |       |       |       |       |       |       |       |       |       |       |       |       |       |       |       |       |       |       |       |       |       |       |       |       |       |       |       |       |       |       |       |       |       |       |       |       |       |       |       |       |       |       |       |       |       |       |       |       |       |       |       |       |       |       |       |       |       |       |       |       |       |       |       |       |       |       |       |       |       |       |       |       |       |       |       |       |       |       |       |       |       |       |       |       |       |       |       |       |       |       |       |       |       |       |       |       |       |       |       |       |       |       |       |       |       |       |       |       |       |       |       |       |       |       |       |       |       |       |       |       |       |       |       |       |       |       |       |       |       |       |       |       |       |       |       |       |       |       |       |       |       |       |       |       |       |       |       |       |       |       |       |       |       |       |       |       |       |       |       |       |       |       |       |       |       |       |       |       |       |       |       |       |       |       |       |       |       |       |
|          |                                  |            |                                                                             |        | Seq-1                       | Seq-2 | Seq-3 | Seq-4 | Seq-5 | Seq-6 | Seq-7 | Seq-8 | Seq-9 | Seq-10 | Seq-11 | Seq-12 | Seq-13 | Seq-14 | Seq-15 | Seq-16 | Seq-17 | Seq-18 | Seq-19 | Seq-20 | Seq-21 | Seq-22 | Seq-23 | Seq-24 | Seq-25 | Seq-26 | Seq-27 | Seq-28 | Seq-29 | Seq-30 | Seq-31 | Seq-32 | Seq-33 | Seq-34 | Seq-35 | Seq-36 | Seq-37 | Seq-38 | Seq-39 | Seq-40 | Seq-41 | Seq-42 |       |       |       |       |       |       |       |       |       |       |       |       |       |       |       |       |       |       |       |       |       |       |       |       |       |       |       |       |       |       |       |       |       |       |       |       |       |       |       |       |       |       |       |       |       |       |       |       |       |       |       |       |       |       |       |       |       |       |       |       |       |       |       |       |       |       |       |       |       |       |       |       |       |       |       |       |       |       |       |       |       |       |       |       |       |       |       |       |       |       |       |       |       |       |       |       |       |       |       |       |       |       |       |       |       |       |       |       |       |       |       |       |       |       |       |       |       |       |       |       |       |       |       |       |       |       |       |       |       |       |       |       |       |       |       |       |       |       |       |       |       |       |       |       |       |       |       |       |       |       |       |       |       |       |       |       |       |       |       |       |       |       |       |       |       |       |       |       |       |       |       |       |       |       |       |       |       |       |       |       |       |       |       |       |       |       |       |       |       |       |       |       |       |       |       |       |       |       |       |       |       |       |       |       |       |       |       |       |       |       |       |       |       |       |       |       |       |       |       |       |       |       |       |       |       |       |       |       |       |       |       |       |       |       |       |       |       |       |       |       |       |       |       |       |       |       |       |       |       |       |       |       |       |       |       |       |       |       |       |       |       |       |       |       |       |       |       |       |       |       |       |       |       |       |       |       |       |       |       |       |       |       |       |       |       |       |       |       |       |       |       |       |       |       |       |       |       |       |       |       |       |       |       |       |       |       |       |       |       |       |       |       |       |       |       |       |       |       |       |       |       |       |       |       |       |       |       |       |       |       |       |       |       |       |       |       |       |       |       |       |       |       |       |       |       |       |       |       |       |       |       |       |       |       |       |       |       |       |       |       |       |       |       |       |       |       |       |       |       |       |       |       |       |       |       |       |       |       |       |       |       |       |       |       |       |       |       |       |       |       |       |       |       |       |       |       |       |       |       |       |       |       |       |       |       |       |       |       |       |       |       |       |       |       |       |       |       |       |       |       |       |       |       |       |       |       |       |       |       |       |       |       |       |       |       |       |       |       |       |       |       |       |       |       |       |       |       |       |       |       |       |       |       |       |       |       |       |       |       |       |       |       |       |       |       |       |       |       |       |       |       |       |       |       |       |       |       |       |       |       |       |       |       |       |       |       |       |       |       |       |       |       |       |       |       |       |       |       |       |       |       |       |       |       |       |       |       |       |       |       |       |       |       |       |       |       |       |       |       |       |       |       |       |       |       |       |       |       |       |       |       |       |       |       |       |       |       |       |       |       |       |       |       |       |       |       |       |       |       |       |       |       |       |       |       |       |       |       |       |       |       |       |       |       |       |       |       |       |       |       |       |       |       |       |       |       |       |       |       |       |       |       |       |       |       |       |       |       |       |       |       |       |       |       |       |       |       |       |       |       |       |       |       |       |       |       |       |       |       |       |       |       |       |       |       |       |       |       |       |       |       |       |       |       |       |       |       |       |       |       |       |       |       |       |       |       |       |       |       |       |       |       |       |       |       |       |       |       |       |       |       |       |       |       |       |       |       |       |       |       |       |       |       |       |       |       |       |       |       |       |       |       |       |       |       |       |       |       |       |       |       |       |       |       |       |       |       |       |       |       |       |       |       |       |       |       |       |       |       |       |       |       |       |       |       |       |       |       |       |       |       |       |       |       |       |       |       |       |       |       |       |       |       |       |       |       |       |       |       |       |       |       |       |       |       |       |       |       |       |       |       |       |       |       |       |       |       |       |       |       |       |       |       |       |       |       |       |       |       |       |       |       |
| 1        | Natural features                 |            | 24.92%                                                                      | 14.29% | 3.57%                       | 3.57% | 3.57% | 3.57% | 3.57% | 3.57% | 7.14% | 7.14% | 7.14% | 7.14%  | 7.14%  | 7.14%  | 7.14%  | 7.14%  | 7.14%  | 7.14%  | 7.14%  | 7.14%  | 7.14%  | 7.14%  | 7.14%  | 7.14%  | 7.14%  | 7.14%  | 7.14%  | 7.14%  | 7.14%  | 7.14%  | 7.14%  | 7.14%  | 7.14%  | 7.14%  | 7.14%  | 7.14%  | 7.14%  | 7.14%  | 7.14%  | 7.14%  | 7.14%  | 7.14%  | 7.14%  | 7.14%  | 7.14% | 7.14% | 7.14% | 7.14% | 7.14% | 7.14% | 7.14% | 7.14% | 7.14% | 7.14% | 7.14% | 7.14% | 7.14% | 7.14% | 7.14% | 7.14% | 7.14% | 7.14% | 7.14% | 7.14% | 7.14% | 7.14% | 7.14% | 7.14% | 7.14% | 7.14% | 7.14% | 7.14% | 7.14% | 7.14% | 7.14% | 7.14% | 7.14% | 7.14% | 7.14% | 7.14% | 7.14% | 7.14% | 7.14% | 7.14% | 7.14% | 7.14% | 7.14% | 7.14% | 7.14% | 7.14% | 7.14% | 7.14% | 7.14% | 7.14% | 7.14% | 7.14% | 7.14% | 7.14% | 7.14% | 7.14% | 7.14% | 7.14% | 7.14% | 7.14% | 7.14% | 7.14% | 7.14% | 7.14% | 7.14% | 7.14% | 7.14% | 7.14% | 7.14% | 7.14% | 7.14% | 7.14% | 7.14% | 7.14% | 7.14% | 7.14% | 7.14% | 7.14% | 7.14% | 7.14% | 7.14% | 7.14% | 7.14% | 7.14% | 7.14% | 7.14% | 7.14% | 7.14% | 7.14% | 7.14% | 7.14% | 7.14% | 7.14% | 7.14% | 7.14% | 7.14% | 7.14% | 7.14% | 7.14% | 7.14% | 7.14% | 7.14% | 7.14% | 7.14% | 7.14% | 7.14% | 7.14% | 7.14% | 7.14% | 7.14% | 7.14% | 7.14% | 7.14% | 7.14% | 7.14% | 7.14% | 7.14% | 7.14% | 7.14% | 7.14% | 7.14% | 7.14% | 7.14% | 7.14% | 7.14% | 7.14% | 7.14% | 7.14% | 7.14% | 7.14% | 7.14% | 7.14% | 7.14% | 7.14% | 7.14% | 7.14% | 7.14% | 7.14% | 7.14% | 7.14% | 7.14% | 7.14% | 7.14% | 7.14% | 7.14% | 7.14% | 7.14% | 7.14% | 7.14% | 7.14% | 7.14% | 7.14% | 7.14% | 7.14% | 7.14% | 7.14% | 7.14% | 7.14% | 7.14% | 7.14% | 7.14% | 7.14% | 7.14% | 7.14% | 7.14% | 7.14% | 7.14% | 7.14% | 7.14% | 7.14% | 7.14% | 7.14% | 7.14% | 7.14% | 7.14% | 7.14% | 7.14% | 7.14% | 7.14% | 7.14% | 7.14% | 7.14% | 7.14% | 7.14% | 7.14% | 7.14% | 7.14% | 7.14% | 7.14% | 7.14% | 7.14% | 7.14% | 7.14% | 7.14% | 7.14% | 7.14% | 7.14% | 7.14% | 7.14% | 7.14% | 7.14% | 7.14% | 7.14% | 7.14% | 7.14% | 7.14% | 7.14% | 7.14% | 7.14% | 7.14% | 7.14% | 7.14% | 7.14% | 7.14% | 7.14% | 7.14% | 7.14% | 7.14% | 7.14% | 7.14% | 7.14% | 7.14% | 7.14% | 7.14% | 7.14% | 7.14% | 7.14% | 7.14% | 7.14% | 7.14% | 7.14% | 7.14% | 7.14% | 7.14% | 7.14% | 7.14% | 7.14% | 7.14% | 7.14% | 7.14% | 7.14% | 7.14% | 7.14% | 7.14% | 7.14% | 7.14% | 7.14% | 7.14% | 7.14% | 7.14% | 7.14% | 7.14% | 7.14% | 7.14% | 7.14% | 7.14% | 7.14% | 7.14% | 7.14% | 7.14% | 7.14% | 7.14% | 7.14% | 7.14% | 7.14% | 7.14% | 7.14% | 7.14% | 7.14% | 7.14% | 7.14% | 7.14% | 7.14% | 7.14% | 7.14% | 7.14% | 7.14% | 7.14% | 7.14% | 7.14% | 7.14% | 7.14% | 7.14% | 7.14% | 7.14% | 7.14% | 7.14% | 7.14% | 7.14% | 7.14% | 7.14% | 7.14% | 7.14% | 7.14% | 7.14% | 7.14% | 7.14% | 7.14% | 7.14% | 7.14% | 7.14% | 7.14% | 7.14% | 7.14% | 7.14% | 7.14% | 7.14% | 7.14% | 7.14% | 7.14% | 7.14% | 7.14% | 7.14% | 7.14% | 7.14% | 7.14% | 7.14% | 7.14% | 7.14% | 7.14% | 7.14% | 7.14% | 7.14% | 7.14% | 7.14% | 7.14% | 7.14% | 7.14% | 7.14% | 7.14% | 7.14% | 7.14% | 7.14% | 7.14% | 7.14% | 7.14% | 7.14% | 7.14% | 7.14% | 7.14% | 7.14% | 7.14% | 7.14% | 7.14% | 7.14% | 7.14% | 7.14% | 7.14% | 7.14% | 7.14% | 7.14% | 7.14% | 7.14% | 7.14% | 7.14% | 7.14% | 7.14% | 7.14% | 7.14% | 7.14% | 7.14% | 7.14% | 7.14% | 7.14% | 7.14% | 7.14% | 7.14% | 7.14% | 7.14% | 7.14% | 7.14% | 7.14% | 7.14% | 7.14% | 7.14% | 7.14% | 7.14% | 7.14% | 7.14% | 7.14% | 7.14% | 7.14% | 7.14% | 7.14% | 7.14% | 7.14% | 7.14% | 7.14% | 7.14% | 7.14% | 7.14% | 7.14% | 7.14% | 7.14% | 7.14% | 7.14% | 7.14% | 7.14% | 7.14% | 7.14% | 7.14% | 7.14% | 7.14% | 7.14% | 7.14% | 7.14% | 7.14% | 7.14% | 7.14% | 7.14% | 7.14% | 7.14% | 7.14% | 7.14% | 7.14% | 7.14% | 7.14% | 7.14% | 7.14% | 7.14% | 7.14% | 7.14% | 7.14% | 7.14% | 7.14% | 7.14% | 7.14% | 7.14% | 7.14% | 7.14% | 7.14% | 7.14% | 7.14% | 7.14% | 7.14% | 7.14% | 7.14% | 7.14% | 7.14% | 7.14% | 7.14% | 7.14% | 7.14% | 7.14% | 7.14% | 7.14% | 7.14% | 7.14% | 7.14% | 7.14% | 7.14% | 7.14% | 7.14% | 7.14% | 7.14% | 7.14% | 7.14% | 7.14% | 7.14% | 7.14% | 7.14% | 7.14% | 7.14% | 7.14% | 7.14% | 7.14% | 7.14% | 7.14% | 7.14% | 7.14% | 7.14% | 7.14% | 7.14% | 7.14% | 7.14% | 7.14% | 7.14% | 7.14% | 7.14% | 7.14% | 7.14% | 7.14% | 7.14% | 7.14% | 7.14% | 7.14% | 7.14% | 7.14% | 7.14% | 7.14% | 7.14% | 7.14% | 7.14% | 7.14% | 7.14% | 7.14% | 7.14% | 7.14% | 7.14% | 7.14% | 7.14% | 7.14% | 7.14% | 7.14% | 7.14% | 7.14% | 7.14% | 7.14% | 7.14% | 7.14% | 7.14% | 7.14% | 7.14% | 7.14% | 7.14% | 7.14% | 7.14% | 7.14% | 7.14% | 7.14% | 7.14% | 7.14% | 7.14% | 7.14% | 7.14% | 7.14% | 7.14% | 7.14% | 7.14% | 7.14% | 7.14% | 7.14% | 7.14% | 7.14% | 7.14% | 7.14% | 7.14% | 7.14% | 7.14% | 7.14% | 7.14% | 7.14% | 7.14% | 7.14% | 7.14% | 7.14% | 7.14% | 7.14% | 7.14% | 7.14% | 7.14% | 7.14% | 7.14% | 7.14% | 7.14% | 7.14% | 7.14% | 7.14% | 7.14% | 7.14% | 7.14% | 7.14% | 7.14% | 7.14% | 7.14% | 7.14% | 7.14% | 7.14% | 7.14% | 7.14% | 7.14% | 7.14% | 7.14% | 7.14% | 7.14% | 7.14% | 7.14% | 7.14% | 7.14% | 7.14% | 7.14% | 7.14% | 7.14% | 7.14% | 7.14% | 7.14% | 7.14% | 7.14% | 7.14% | 7.14% | 7.14% | 7.14% | 7.14% | 7.14% | 7.14% | 7.14% | 7.14% | 7.14% | 7.14% | 7.14% | 7.14% | 7.14% | 7.14% | 7.14% | 7.14% | 7.14% | 7.14% | 7.14% | 7.14% | 7.14% | 7.14% | 7.14% | 7.14% | 7.14% | 7.14% | 7.14% | 7.14% | 7.14% | 7.14% | 7.14% | 7.14% | 7.14% | 7.14% | 7.14% | 7.14% | 7.14% | 7.14% | 7.14% | 7.14% | 7.14% | 7.14% | 7.14% | 7.14% | 7.14% | 7.14% | 7.14% | 7.14% | 7.14% | 7.14% | 7.14% | 7.14% | 7.14% | 7.14% | 7.14% | 7.14% | 7.14% | 7.14% | 7.14% | 7.14% | 7.14% | 7.14% | 7.14% | 7.14% | 7.14% | 7.14% | 7.14% | 7.14% | 7.14% | 7.14% | 7.14% | 7.14% | 7.14% | 7.14% | 7.14% | 7.14% | 7.14% | 7.14% | 7.14% | 7.14% | 7.14% | 7.14% | 7.14% | 7.14% | 7.14% | 7.14% | 7.14% | 7.14% | 7.14% | 7.14% | 7.14% | 7.14% | 7.14% | 7.14% | 7.14% | 7.14% | 7.14% | 7.14% | 7.14% | 7.14% | 7.14% | 7.14% | 7.14% | 7.14% | 7.14% | 7.14% | 7.14% | 7.14% | 7.14% | 7.14% | 7.14% | 7.14% | 7.14% | 7.14% | 7.14% | 7.14% | 7.14% | 7.14% | 7.14% | 7.14% | 7.14% | 7.14% | 7.14% | 7.14% | 7.14% | 7.14% | 7.14% | 7.14% | 7.14% | 7.14% | 7.14% | 7.14% | 7.14% | 7.14% | 7.14% | 7.14% | 7.14% | 7.14% | 7.14% | 7.14% | 7.14% | 7.14% | 7.14% | 7.14% | 7.14% | 7.14% | 7.14% | 7.14% | 7.14% | 7.14% | 7.14% | 7.14% | 7.14% | 7.14% | 7.14% | 7.14% | 7.14% | 7.14% | 7.14% | 7.14% | 7.14% | 7.14% | 7.14% | 7.14% | 7.14% | 7.14% | 7.14% | 7.14% | 7.14% | 7.14% | 7.14% | 7.14% | 7.14% |

|          |                                  |                                                               | Table S4: Weight scenarios in which Factors were weighted by FAHP, Equal and sequential ranking method, and sub-factors were weighted using FAHP and indicators with equal weights |        |                                                    |       |       |       |       |       |       |       |       |       |       |        |        |        |        |        |        |        |        |        |        |        |        |        |        |        |        |        |        |        |        |        |        |        |        |        |        |        |        |        |
|----------|----------------------------------|---------------------------------------------------------------|------------------------------------------------------------------------------------------------------------------------------------------------------------------------------------|--------|----------------------------------------------------|-------|-------|-------|-------|-------|-------|-------|-------|-------|-------|--------|--------|--------|--------|--------|--------|--------|--------|--------|--------|--------|--------|--------|--------|--------|--------|--------|--------|--------|--------|--------|--------|--------|--------|--------|--------|--------|--------|--------|
| Factor # | Relevant factors and Sub-Factors | Indicators                                                    | FAHP                                                                                                                                                                               | Equal  | Weights of Factors, Sub factors and indicators (%) |       |       |       |       |       |       |       |       |       |       |        |        |        |        |        |        |        |        |        |        |        |        |        |        |        |        |        |        |        |        |        |        |        |        |        |        |        |        |        |
|          |                                  |                                                               |                                                                                                                                                                                    |        | Sequential Ranking approach                        |       |       |       |       |       |       |       |       |       |       |        |        |        |        |        |        |        |        |        |        |        |        |        |        |        |        |        | Seq-29 | Seq-30 | Seq-31 | Seq-32 | Seq-33 | Seq-34 | Seq-35 | Seq-36 | Seq-37 | Seq-38 | Seq-39 | Seq-40 |
| 1        | Natural features                 |                                                               | 24.92%                                                                                                                                                                             | 14.29% | 3.57%                                              | 3.57% | 3.57% | 3.57% | 3.57% | 3.57% | 7.14% | 7.14% | 7.14% | 7.14% | 7.14% | 10.71% | 10.71% | 10.71% | 10.71% | 14.29% | 14.29% | 14.29% | 14.29% | 14.29% | 17.86% | 17.86% | 17.86% | 17.86% | 17.86% | 17.86% | 21.43% | 21.43% | 21.43% | 21.43% | 21.43% | 21.43% | 25.00% | 25.00% | 25.00% | 25.00% | 25.00% | 25.00% |        |        |
|          | Geography                        |                                                               | 2.18%                                                                                                                                                                              | 1.25%  | 0.31%                                              | 0.31% | 0.31% | 0.31% | 0.31% | 0.62% | 0.62% | 0.62% | 0.62% | 0.62% | 0.94% | 0.94%  | 0.94%  | 0.94%  | 0.94%  | 1.25%  | 1.25%  | 1.25%  | 1.25%  | 1.25%  | 1.56%  | 1.56%  | 1.56%  | 1.56%  | 1.56%  | 1.87%  | 1.87%  | 1.87%  | 1.87%  | 1.87%  | 1.87%  | 2.18%  | 2.18%  | 2.18%  | 2.18%  | 2.18%  | 2.18%  |        |        |        |
|          |                                  | Basin area in each country [Km2]                              | 1.09%                                                                                                                                                                              | 0.62%  | 0.16%                                              | 0.16% | 0.16% | 0.16% | 0.16% | 0.16% | 0.31% | 0.31% | 0.31% | 0.31% | 0.31% | 0.31%  | 0.47%  | 0.47%  | 0.47%  | 0.47%  | 0.47%  | 0.62%  | 0.62%  | 0.62%  | 0.62%  | 0.62%  | 0.78%  | 0.78%  | 0.78%  | 0.78%  | 0.78%  | 0.94%  | 0.94%  | 0.94%  | 0.94%  | 0.94%  | 0.94%  | 1.09%  | 1.09%  | 1.09%  | 1.09%  | 1.09%  | 1.09%  |        |
|          | Hydrography                      |                                                               | 1.09%                                                                                                                                                                              | 0.62%  | 0.16%                                              | 0.16% | 0.16% | 0.16% | 0.16% | 0.16% | 0.31% | 0.31% | 0.31% | 0.31% | 0.31% | 0.47%  | 0.47%  | 0.47%  | 0.47%  | 0.47%  | 0.62%  | 0.62%  | 0.62%  | 0.62%  | 0.62%  | 0.78%  | 0.78%  | 0.78%  | 0.78%  | 0.78%  | 0.94%  | 0.94%  | 0.94%  | 0.94%  | 0.94%  | 0.94%  | 1.09%  | 1.09%  | 1.09%  | 1.09%  | 1.09%  | 1.09%  |        |        |
|          |                                  | The whole area in each country [Km2]                          | 1.41%                                                                                                                                                                              | 0.81%  | 0.20%                                              | 0.20% | 0.20% | 0.20% | 0.20% | 0.20% | 0.40% | 0.40% | 0.40% | 0.40% | 0.40% | 0.60%  | 0.60%  | 0.60%  | 0.60%  | 0.60%  | 0.81%  | 0.81%  | 0.81%  | 0.81%  | 0.81%  | 1.01%  | 1.01%  | 1.01%  | 1.01%  | 1.01%  | 1.21%  | 1.21%  | 1.21%  | 1.21%  | 1.21%  | 1.21%  | 1.41%  | 1.41%  | 1.41%  | 1.41%  | 1.41%  | 1.41%  |        |        |
|          | Climate                          |                                                               | 1.41%                                                                                                                                                                              | 0.81%  | 0.20%                                              | 0.20% | 0.20% | 0.20% | 0.20% | 0.20% | 0.40% | 0.40% | 0.40% | 0.40% | 0.40% | 0.60%  | 0.60%  | 0.60%  | 0.60%  | 0.60%  | 0.81%  | 0.81%  | 0.81%  | 0.81%  | 0.81%  | 1.01%  | 1.01%  | 1.01%  | 1.01%  | 1.01%  | 1.21%  | 1.21%  | 1.21%  | 1.21%  | 1.21%  | 1.21%  | 1.41%  | 1.41%  | 1.41%  | 1.41%  | 1.41%  | 1.41%  |        |        |
|          |                                  | River length in each country [Km]                             | 7.67%                                                                                                                                                                              | 4.40%  | 1.10%                                              | 1.10% | 1.10% | 1.10% | 1.10% | 1.10% | 2.20% | 2.20% | 2.20% | 2.20% | 2.20% | 3.30%  | 3.30%  | 3.30%  | 3.30%  | 3.30%  | 4.40%  | 4.40%  | 4.40%  | 4.40%  | 4.40%  | 5.50%  | 5.50%  | 5.50%  | 5.50%  | 5.50%  | 6.60%  | 6.60%  | 6.60%  | 6.60%  | 6.60%  | 6.60%  | 7.70%  | 7.70%  | 7.70%  | 7.70%  | 7.70%  | 7.70%  |        |        |
|          | Hydrology                        |                                                               | 2.56%                                                                                                                                                                              | 2.56%  | 2.56%                                              | 2.56% | 2.56% | 2.56% | 2.56% | 2.56% | 2.56% | 2.56% | 2.56% | 2.56% | 2.56% | 2.56%  | 2.56%  | 2.56%  | 2.56%  | 2.56%  | 2.56%  | 2.56%  | 2.56%  | 2.56%  | 2.56%  | 2.56%  | 2.56%  | 2.56%  | 2.56%  | 2.56%  | 2.56%  | 2.56%  | 2.56%  | 2.56%  | 2.56%  | 2.56%  | 2.56%  | 2.56%  | 2.56%  | 2.56%  | 2.56%  | 2.56%  | 2.56%  |        |
|          |                                  | Köppen Aridity Index                                          | 2.56%                                                                                                                                                                              | 2.56%  | 2.56%                                              | 2.56% | 2.56% | 2.56% | 2.56% | 2.56% | 2.56% | 2.56% | 2.56% | 2.56% | 2.56% | 2.56%  | 2.56%  | 2.56%  | 2.56%  | 2.56%  | 2.56%  | 2.56%  | 2.56%  | 2.56%  | 2.56%  | 2.56%  | 2.56%  | 2.56%  | 2.56%  | 2.56%  | 2.56%  | 2.56%  | 2.56%  | 2.56%  | 2.56%  | 2.56%  | 2.56%  | 2.56%  | 2.56%  | 2.56%  | 2.56%  | 2.56%  | 2.56%  |        |
|          | Ecology                          |                                                               | 2.56%                                                                                                                                                                              | 2.56%  | 2.56%                                              | 2.56% | 2.56% | 2.56% | 2.56% | 2.56% | 2.56% | 2.56% | 2.56% | 2.56% | 2.56% | 2.56%  | 2.56%  | 2.56%  | 2.56%  | 2.56%  | 2.56%  | 2.56%  | 2.56%  | 2.56%  | 2.56%  | 2.56%  | 2.56%  | 2.56%  | 2.56%  | 2.56%  | 2.56%  | 2.56%  | 2.56%  | 2.56%  | 2.56%  | 2.56%  | 2.56%  | 2.56%  | 2.56%  | 2.56%  | 2.56%  | 2.56%  | 2.56%  | 2.56%  |
|          |                                  | Median Drought vulnerability index Resilience Index]          | 7.67%                                                                                                                                                                              | 4.40%  | 1.10%                                              | 1.10% | 1.10% | 1.10% | 1.10% | 1.10% | 2.20% | 2.20% | 2.20% | 2.20% | 2.20% | 3.30%  | 3.30%  | 3.30%  | 3.30%  | 3.30%  | 4.40%  | 4.40%  | 4.40%  | 4.40%  | 4.40%  | 5.50%  | 5.50%  | 5.50%  | 5.50%  | 5.50%  | 6.60%  | 6.60%  | 6.60%  | 6.60%  | 6.60%  | 6.60%  | 7.70%  | 7.70%  | 7.70%  | 7.70%  | 7.70%  | 7.70%  |        |        |
|          | Ecology                          |                                                               | 3.84%                                                                                                                                                                              | 2.20%  | 0.55%                                              | 0.55% | 0.55% | 0.55% | 0.55% | 0.55% | 1.10% | 1.10% | 1.10% | 1.10% | 1.10% | 1.65%  | 1.65%  | 1.65%  | 1.65%  | 1.65%  | 2.20%  | 2.20%  | 2.20%  | 2.20%  | 2.20%  | 2.75%  | 2.75%  | 2.75%  | 2.75%  | 2.75%  | 3.30%  | 3.30%  | 3.30%  | 3.30%  | 3.30%  | 3.30%  | 3.85%  | 3.85%  | 3.85%  | 3.85%  | 3.85%  | 3.85%  |        |        |
|          |                                  | Annualwater contribution [Bm3/yr]                             | 3.84%                                                                                                                                                                              | 2.20%  | 0.55%                                              | 0.55% | 0.55% | 0.55% | 0.55% | 0.55% | 1.10% | 1.10% | 1.10% | 1.10% | 1.10% | 1.65%  | 1.65%  | 1.65%  | 1.65%  | 1.65%  | 2.20%  | 2.20%  | 2.20%  | 2.20%  | 2.20%  | 2.75%  | 2.75%  | 2.75%  | 2.75%  | 2.75%  | 3.30%  | 3.30%  | 3.30%  | 3.30%  | 3.30%  | 3.30%  | 3.85%  | 3.85%  | 3.85%  | 3.85%  | 3.85%  | 3.85%  |        |        |
|          | Ecology                          |                                                               | 5.99%                                                                                                                                                                              | 3.43%  | 0.86%                                              | 0.86% | 0.86% | 0.86% | 0.86% | 0.86% | 1.72% | 1.72% | 1.72% | 1.72% | 1.72% | 2.58%  | 2.58%  | 2.58%  | 2.58%  | 2.58%  | 3.43%  | 3.43%  | 3.43%  | 3.43%  | 3.43%  | 4.29%  | 4.29%  | 4.29%  | 4.29%  | 4.29%  | 5.15%  | 5.15%  | 5.15%  | 5.15%  | 5.15%  | 5.15%  | 6.01%  | 6.01%  | 6.01%  | 6.01%  | 6.01%  | 6.01%  |        |        |
|          |                                  | Water stress index[%]                                         | 2.00%                                                                                                                                                                              | 1.14%  | 0.29%                                              | 0.29% | 0.29% | 0.29% | 0.29% | 0.29% | 0.57% | 0.57% | 0.57% | 0.57% | 0.57% | 0.86%  | 0.86%  | 0.86%  | 0.86%  | 0.86%  | 1.14%  | 1.14%  | 1.14%  | 1.14%  | 1.14%  | 1.43%  | 1.43%  | 1.43%  | 1.43%  | 1.43%  | 1.72%  | 1.72%  | 1.72%  | 1.72%  | 1.72%  | 1.72%  | 2.00%  | 2.00%  | 2.00%  | 2.00%  | 2.00%  | 2.00%  |        |        |
|          | Ecology                          |                                                               | 2.00%                                                                                                                                                                              | 1.14%  | 0.29%                                              | 0.29% | 0.29% | 0.29% | 0.29% | 0.29% | 0.57% | 0.57% | 0.57% | 0.57% | 0.57% | 0.86%  | 0.86%  | 0.86%  | 0.86%  | 0.86%  | 1.14%  | 1.14%  | 1.14%  | 1.14%  | 1.14%  | 1.43%  | 1.43%  | 1.43%  | 1.43%  | 1.43%  | 1.72%  | 1.72%  | 1.72%  | 1.72%  | 1.72%  | 1.72%  | 2.00%  | 2.00%  | 2.00%  | 2.00%  | 2.00%  | 2.00%  |        |        |
|          |                                  | Minimum environmental flow with moderate mgt class [Mm3/year] | 2.00%                                                                                                                                                                              | 1.14%  | 0.29%                                              | 0.29% | 0.29% | 0.29% | 0.29% | 0.29% | 0.57% | 0.57% | 0.57% | 0.57% | 0.57% | 0.86%  | 0.86%  | 0.86%  | 0.86%  | 0.86%  | 1.14%  | 1.14%  | 1.14%  | 1.14%  | 1.14%  | 1.43%  | 1.43%  | 1.43%  | 1.43%  | 1.43%  | 1.72%  | 1.72%  | 1.72%  | 1.72%  | 1.72%  | 1.72%  | 2.00%  | 2.00%  | 2.00%  | 2.00%  | 2.00%  | 2.00%  |        |        |
|          | Ecology                          |                                                               | 2.00%                                                                                                                                                                              | 1.14%  | 0.29%                                              | 0.29% | 0.29% | 0.29% | 0.29% | 0.29% | 0.57% | 0.57% | 0.57% | 0.57% | 0.57% | 0.86%  | 0.86%  | 0.86%  | 0.86%  | 0.86%  | 1.14%  | 1.14%  | 1.14%  | 1.14%  | 1.14%  | 1.43%  | 1.43%  | 1.43%  | 1.43%  | 1.43%  | 1.72%  | 1.72%  | 1.72%  | 1.72%  | 1.72%  | 1.72%  | 2.00%  | 2.00%  | 2.00%  | 2.00%  | 2.00%  | 2.00%  |        |        |
|          |                                  | Greenhouse gas emissions(kt of CO2 eq)                        | 2.00%                                                                                                                                                                              | 1.14%  | 0.29%                                              | 0.29% | 0.29% | 0.29% | 0.29% | 0.29% | 0.57% | 0.57% | 0.57% | 0.57% | 0.57% | 0.86%  | 0.86%  | 0.86%  | 0.86%  | 0.86%  | 1.14%  | 1.14%  | 1.14%  | 1.14%  | 1.14%  | 1.43%  | 1.43%  | 1.43%  | 1.43%  | 1.43%  | 1.72%  | 1.72%  | 1.72%  | 1.72%  | 1.72%  | 1.72%  | 2.00%  | 2.00%  |        |        |        |        |        |        |

Table S5: A sample calculation of riparian countries water apportionment from the Blue Nile sub-basin in which factors are weighted by FAHP and sub-factors weight was distributed equally

| Factor #           | Relevant factors and Indicators under them                                                                     | Indicator relationship with score | Weight (%)    | Score of individual watercourse states |            |            |            | Estimate of countries weighted share from each indicators |              |              |              |
|--------------------|----------------------------------------------------------------------------------------------------------------|-----------------------------------|---------------|----------------------------------------|------------|------------|------------|-----------------------------------------------------------|--------------|--------------|--------------|
|                    |                                                                                                                |                                   |               | Egypt                                  | Ethiopia   | Sudan      | Total      | Egypt                                                     | Ethiopia     | Sudan        | Total        |
| 1                  | <b>Natural features</b>                                                                                        |                                   | <b>24.92%</b> |                                        |            |            |            |                                                           |              |              |              |
|                    | SF1 - Basin area in each country [Km2]                                                                         | Direct                            | 2.49%         | 302,452                                | 365,318    | 1,396,230  | 2,064,000  | 0.004                                                     | 0.004        | 0.017        | 0.025        |
|                    | SF1 - The whole area in each country [Km2]                                                                     | Direct                            | 2.49%         | 996,960                                | 1,144,035  | 1,864,049  | 4,005,044  | 0.006                                                     | 0.007        | 0.012        | 0.025        |
|                    | SF2 - River length in each country [Km]                                                                        | Direct                            | 4.98%         | 1,747                                  | 1,321      | 2,827      | 5,895      | 0.015                                                     | 0.011        | 0.024        | 0.050        |
|                    | SF3 - Köppen Aridity Index (Precipitation/Temperature+33) in each country                                      | Reverse                           | 1.66%         | 0.49                                   | 20.97      | 4.26       | 25.72      | 0.015                                                     | 0.000        | 0.002        | 0.017        |
|                    | SF3 - Median Drought vulnerability index                                                                       | Direct                            | 1.66%         | 0.20                                   | 0.72       | 0.61       | 1.53       | 0.002                                                     | 0.008        | 0.007        | 0.017        |
|                    | SF3 - Water-food-energy risk index or [Resilience Index]                                                       | Reverse                           | 1.66%         | 1.51                                   | 2.94       | 2.26       | 6.71       | 0.008                                                     | 0.004        | 0.005        | 0.017        |
|                    | SF4 - Annual surface water contribution of each countries [Bm3/year]                                           | Direct                            | 2.49%         | 0.00                                   | 53.22      | 0.00       | 53.22      | 0.000                                                     | 0.025        | 0.000        | 0.025        |
|                    | SF4 - Water stress index[%] in each country                                                                    | Direct                            | 2.49%         | 117.30                                 | 32.26      | 118.60     | 268.16     | 0.011                                                     | 0.003        | 0.011        | 0.025        |
|                    | SF5 - 95% time flow exceeded minimum environmental flow with moderate management class [Mm3/year]              | Direct                            | 1.66%         | 1,233.07                               | 652.00     | 988.58     | 2,873.65   | 0.007                                                     | 0.004        | 0.006        | 0.017        |
|                    | SF5 - Total greenhouse gas emissions (kt of CO2 equivalent) in each country                                    | Reverse                           | 1.66%         | 295,500                                | 185,292    | 491,982    | 972,774    | 0.005                                                     | 0.008        | 0.003        | 0.017        |
|                    | SF5 - Environmental performance index in each country                                                          | Direct                            | 1.66%         | 43.30                                  | 34.40      | 34.80      | 112.50     | 0.006                                                     | 0.005        | 0.005        | 0.017        |
| 2                  | <b>Social and economic needs of the watercourse States concerned</b>                                           |                                   | <b>15.57%</b> |                                        |            |            |            |                                                           |              |              |              |
|                    | SF8 - GDP per capita in each country [Current \$]                                                              | Reverse                           | 0.49%         | 3,020.00                               | 857.50     | 780.60     | 4,658.10   | 0.001                                                     | 0.002        | 0.002        | 0.005        |
|                    | SF8 - Gross National income per capita in each country [\$]                                                    | Reverse                           | 0.49%         | 11,350.00                              | 2,140.00   | 4,430.00   | 17,920.00  | 0.001                                                     | 0.003        | 0.001        | 0.005        |
|                    | SF8 - Exports and imports trade (% of GDP)                                                                     | Reverse                           | 0.49%         | 48.28                                  | 31.17      | 22.59      | 102.04     | 0.001                                                     | 0.002        | 0.002        | 0.005        |
|                    | SF8 - Income index                                                                                             | Reverse                           | 0.49%         | 0.71                                   | 0.44       | 0.56       | 1.70       | 0.001                                                     | 0.002        | 0.002        | 0.005        |
|                    | SF9 - Unemployment in the basin in each country [%]                                                            | Direct                            | 0.97%         | 10.80                                  | 2.10       | 16.50      | 29.40      | 0.004                                                     | 0.001        | 0.005        | 0.010        |
|                    | SF9 - Vulnerable employment (% of total employment)                                                            | Direct                            | 0.97%         | 21.00                                  | 86.00      | 50.00      | 157.00     | 0.001                                                     | 0.005        | 0.003        | 0.010        |
|                    | SF10 - Population with access to electricity [%]                                                               | Reverse                           | 0.32%         | 100.00                                 | 45.00      | 59.80      | 204.80     | 0.001                                                     | 0.001        | 0.001        | 0.003        |
|                    | SF10 - Relative significance of hydropower in each Nile basin countries[%]                                     | Direct                            | 0.32%         | 12.00                                  | 95.00      | 49.00      | 156.00     | 0.000                                                     | 0.002        | 0.001        | 0.003        |
|                    | SF10 - Population using basic drinking-water supply [%]                                                        | Reverse                           | 0.32%         | 99.00                                  | 41.00      | 60.00      | 200.00     | 0.001                                                     | 0.002        | 0.001        | 0.003        |
|                    | SF10 - People with access to clean cooking [%]                                                                 | Reverse                           | 0.32%         | 98.00                                  | 4.00       | 41.00      | 143.00     | 0.000                                                     | 0.003        | 0.000        | 0.003        |
|                    | SF10 - Water supply and sanitation index                                                                       | Reverse                           | 0.32%         | 98.90                                  | 39.74      | 66.80      | 205.43     | 0.001                                                     | 0.002        | 0.001        | 0.003        |
|                    | SF10 - Infrastructure development index                                                                        | Reverse                           | 0.32%         | 88.39                                  | 10.49      | 17.16      | 116.04     | 0.000                                                     | 0.002        | 0.001        | 0.003        |
|                    | SF11 - Human Development Index (HDI) in each country [%]                                                       | Reverse                           | 1.95%         | 0.70                                   | 0.47       | 0.51       | 1.68       | 0.005                                                     | 0.007        | 0.007        | 0.019        |
|                    | SF12 - Multidimensional Poverty index                                                                          | Direct                            | 0.65%         | 0.02                                   | 0.49       | 0.28       | 0.79       | 0.000                                                     | 0.004        | 0.002        | 0.006        |
|                    | SF12 - Population living below income poverty line [%]                                                         | Direct                            | 0.65%         | 1.30                                   | 27.30      | 14.90      | 43.50      | 0.000                                                     | 0.004        | 0.002        | 0.006        |
|                    | SF12 - Hunger Index                                                                                            | Direct                            | 0.65%         | 14.60                                  | 28.90      | 32.80      | 76.30      | 0.001                                                     | 0.002        | 0.003        | 0.006        |
|                    | SF13 - Education index                                                                                         | Reverse                           | 1.95%         | 0.61                                   | 0.34       | 0.34       | 1.28       | 0.004                                                     | 0.008        | 0.008        | 0.019        |
|                    | SF14 - Life expectancy Index                                                                                   | Reverse                           | 1.95%         | 71.66                                  | 65.87      | 64.70      | 202.23     | 0.006                                                     | 0.007        | 0.007        | 0.019        |
|                    | SF15 - Gender Development Index (GDI) in each country [%]                                                      | Reverse                           | 1.95%         | 0.88                                   | 0.84       | 0.84       | 2.56       | 0.006                                                     | 0.007        | 0.007        | 0.019        |
| 3                  | <b>The population dependent on the watercourse in each watercourse state</b>                                   |                                   | <b>11.21%</b> |                                        |            |            |            |                                                           |              |              |              |
|                    | SF16 - Population in the Nile basin countries [in millions] in 2019                                            | Direct                            | 1.12%         | 100.39                                 | 112.08     | 42.81      | 255.28     | 0.004                                                     | 0.005        | 0.002        | 0.011        |
|                    | SF16 - Population living in the basin in each country [%]                                                      | Direct                            | 1.12%         | 93.77                                  | 37.83      | 86.98      | 218.58     | 0.005                                                     | 0.002        | 0.004        | 0.011        |
|                    | SF16 - Population growth rate [%]                                                                              | Direct                            | 5.60%         | 2.03                                   | 2.62       | 2.39       | 7.05       | 0.016                                                     | 0.021        | 0.019        | 0.056        |
|                    | SF16 - Employment in agriculture (% of total employment)                                                       | Direct                            | 1.12%         | 24.00                                  | 66.00      | 40.00      | 130.00     | 0.002                                                     | 0.006        | 0.003        | 0.011        |
|                    | SF16 - Employment in marine and inland fisheries [No]                                                          | Direct                            | 1.12%         | 796,400                                | 23,365     | 17,400     | 837,165    | 0.011                                                     | 0.000        | 0.000        | 0.011        |
|                    | SF16 - Agriculture, forestry, and fishing, value added (% of GDP)                                              | Direct                            | 1.12%         | 11.00                                  | 33.90      | 28.40      | 73.30      | 0.002                                                     | 0.005        | 0.004        | 0.011        |
| 4                  | <b>The effects of the use or uses of the watercourses in one watercourse State on other watercourse states</b> |                                   | <b>25.62%</b> |                                        |            |            |            |                                                           |              |              |              |
|                    | SF17 - Fertile soil loss by erosion or sediment yield per year [Million tons/year]                             | Direct                            | 8.54%         | -91.68                                 | 140.00     | -50.09     | 140.00     | 0.000                                                     | 0.085        | 0.000        | 0.085        |
|                    | SF18 - Average annual surface water volumetric reliability index [%]                                           | Reverse                           | 8.54%         | 0.81                                   | 1.00       | 1.00       | 2.81       | 0.033                                                     | 0.026        | 0.026        | 0.085        |
|                    | SF19 - Water quality index                                                                                     | Direct                            | 8.54%         | 77.98                                  | 55.27      | 67.04      | 200.29     | 0.033                                                     | 0.024        | 0.029        | 0.085        |
| 5                  | <b>Existing and potential uses of the watercourse</b>                                                          |                                   | <b>10.57%</b> |                                        |            |            |            |                                                           |              |              |              |
|                    | SF20 - Gross Irrigation water demand in each basin countries [Bm3/yr]                                          | Direct                            | 1.32%         | 57.07                                  | 2.02       | 13.32      | 72.41      | 0.010                                                     | 0.000        | 0.002        | 0.013        |
|                    | SF20 - Potential irrigation remaining area in each basin country [Hectare]                                     | Direct                            | 1.76%         | 820,000                                | 2,566,000  | 735,000    | 4,121,000  | 0.004                                                     | 0.011        | 0.003        | 0.018        |
|                    | SF20 - Existing domestic and industrial water demand in each basin countries [Bm3/year]                        | Direct                            | 1.32%         | 10.20                                  | 0.19       | 0.29       | 10.68      | 0.013                                                     | 0.000        | 0.000        | 0.013        |
|                    | SF20 - Projected domestic water demand by 2050 in each basin countries [Bm3/year]                              | Direct                            | 1.76%         | 13.14                                  | 2.43       | 2.87       | 18.44      | 0.013                                                     | 0.002        | 0.003        | 0.018        |
|                    | SF20 - Energy Consumption per Capita (Kg of oil equivalent per capita)                                         | Direct                            | 1.32%         | 913.06                                 | 493.47     | 342.13     | 1,748.66   | 0.007                                                     | 0.004        | 0.003        | 0.013        |
|                    | SF20 - Existing Hydropower production in the basin in each country[MW]                                         | Direct                            | 1.32%         | 2,862.00                               | 1,946.00   | 1,593.00   | 6,401.00   | 0.006                                                     | 0.004        | 0.003        | 0.013        |
|                    | SF20 - Remaining potential Hydropower production in the basin in each country[MW]                              | Direct                            | 1.76%         | 40.00                                  | 11,583.00  | 3,280.00   | 14,903.00  | 0.000                                                     | 0.014        | 0.004        | 0.018        |
| 6                  | <b>Conservation, protection, development and economy of uses and the costs of measures taken</b>               |                                   | <b>8.16%</b>  |                                        |            |            |            |                                                           |              |              |              |
|                    | SF21 - Areas exposed for severe soil erosion in each country with a rate of (>80kg/ha/yr) [Km2]                | Direct                            | 2.04%         | 0.00                                   | 39,375.00  | 0.00       | 39,375.00  | 0.000                                                     | 0.020        | 0.000        | 0.020        |
|                    | SF22 - Loss of water by evaporation from dams in each basin countries [BCM/year]                               | Reverse                           | 1.02%         | 12.58                                  | 0.18       | 4.56       | 17.32      | 0.000                                                     | 0.010        | 0.000        | 0.010        |
|                    | SF22 - Water use efficiency [USD/m3]                                                                           | Direct                            | 1.02%         | 3.80                                   | 1.90       | 1.60       | 7.30       | 0.005                                                     | 0.003        | 0.002        | 0.010        |
|                    | SF22 - Wetland area [Km2]                                                                                      | Direct                            | 1.02%         | 426.00                                 | 2,828.70   | 10,846.00  | 14,100.70  | 0.000                                                     | 0.002        | 0.008        | 0.010        |
|                    | SF22 - Cereal yield (kg per hectare)                                                                           | Direct                            | 1.02%         | 72,525.00                              | 22,167.00  | 5,895.00   | 100,587.00 | 0.007                                                     | 0.002        | 0.001        | 0.010        |
|                    | SF23 - Gross investment made on hydraulic structures or Dams [million USD]                                     | Direct                            | 1.02%         | 1.00                                   | 7.39       | 4.38       | 12.77      | 0.001                                                     | 0.006        | 0.003        | 0.010        |
|                    | SF23 - Total agricultural export value (1000)                                                                  | Reverse                           | 1.02%         | 4,056,931                              | 2,373,603  | 551,613    | 6,982,147  | 0.001                                                     | 0.002        | 0.007        | 0.010        |
| 7                  | <b>The availability of alternatives, of comparable value</b>                                                   |                                   | <b>3.95%</b>  |                                        |            |            |            |                                                           |              |              |              |
|                    | SF24 - Alternative energy source from Solar(both PV and CSP) [TWh/year]                                        | Reverse                           | 0.003         | 58,823.00                              | 50,113.00  | 165,239.00 | 274,175.00 | 0.001                                                     | 0.001        | 0.000        | 0.003        |
|                    | SF24 - Alternative energy source from Wind [TWh/year]                                                          | Reverse                           | 0.003         | 36,601.00                              | 14,838.00  | 61,661.00  | 113,100.00 | 0.001                                                     | 0.002        | 0.000        | 0.003        |
|                    | SF24 - Alternative energy source from Geothermal [MW]                                                          | Reverse                           | 0.003         | 0.00                                   | 10,000.00  | 0.00       | 10,000.00  | 0.001                                                     | 0.000        | 0.001        | 0.003        |
|                    | SF24 - Alternative energy source from oil [proved oil reserves in thousand million barrels]                    | Reverse                           | 0.003         | 3.47                                   | 0.00       | 1.50       | 4.97       | 0.000                                                     | 0.002        | 0.001        | 0.003        |
|                    | SF24 - Alternative energy source from natural gas [proved reserves trillion cubic metres]                      | Reverse                           | 0.003         | 1.85                                   | 0.00       | 0.00       | 1.85       | 0.000                                                     | 0.001        | 0.001        | 0.003        |
|                    | SF24 - Alternative energy source from generated waste via incineration method [GWh]                            | Reverse                           | 0.003         | 287,088.00                             | 49,946.00  | 107,020.00 | 444,054.00 | 0.000                                                     | 0.002        | 0.001        | 0.003        |
|                    | SF24 - Total Renewable ground water resource[BCM/yr]                                                           | Reverse                           | 0.003         | 1.50                                   | 20.00      | 3.00       | 24.50      | 0.002                                                     | 0.000        | 0.001        | 0.003        |
|                    | SF25 - Average income from Tourism [Million US\$]                                                              | Reverse                           | 0.004         | 6,900.35                               | 1,010.87   | 1,029.00   | 8,940.22   | 0.000                                                     | 0.002        | 0.002        | 0.004        |
|                    | SF25 - Alternative source of food and income from Livestock resource                                           | -                                 | 0.004         |                                        |            |            |            | 0.000                                                     | 0.000        | 0.000        | 0.000        |
|                    | - Cattle [Head]                                                                                                | Reverse                           | 0.001         | 5,064,509                              | 60,926,913 | 30,734,061 | 96,725,483 | 0.001                                                     | 0.000        | 0.000        | 0.001        |
|                    | - Sheep [Head]                                                                                                 | Reverse                           | 0.001         | 5,697,716                              | 31,836,701 | 40,573,686 | 78,108,103 | 0.001                                                     | 0.000        | 0.000        | 0.001        |
|                    | - Chicken [1000 Head]                                                                                          | Reverse                           | 0.001         | 156,453                                | 59,489     | 48,299     | 264,241    | 0.000                                                     | 0.000        | 0.000        | 0.001        |
|                    | - Goat [Head]                                                                                                  | Reverse                           | 0.001         | 4,351,545                              | 30,719,382 | 31,443,790 | 66,514,712 | 0.001                                                     | 0.000        | 0.000        | 0.001        |
|                    | - Beehives[No]                                                                                                 | Reverse                           | 0.001         | 877,637                                | 6,139,990  | 76,095     | 7,093,722  | 0.000                                                     | 0.000        | 0.001        | 0.001        |
|                    | SF25 - 55 years average fish and aquaculture production [ metric ton/yr]                                       | Reverse                           | 0.004         | 732,455.61                             | 12,313.83  | 38,079.64  | 782,849.08 | 0.000                                                     | 0.003        | 0.001        | 0.004        |
|                    | SF25 - Industry value added (%GDP)- including construction industry                                            | Reverse                           | 0.004         | 35.08                                  | 27.26      | 2.38       | 64.72      | 0.000                                                     | 0.000        | 0.003        | 0.004        |
|                    | SF25 - Employment in service provision sector [% of total employment]                                          | Reverse                           | 0.004         | 48.55                                  | 21.80      | 41.86      | 112.21     | 0.001                                                     | 0.002        | 0.001        | 0.004        |
| <b>Total share</b> |                                                                                                                |                                   |               |                                        |            |            |            | <b>0.294</b>                                              | <b>0.415</b> | <b>0.291</b> | <b>1.000</b> |

**Table S6:** A sample calculation of riparian countries water apportionment from the Tekeze-Atbara sub-basin in which factors are weighted by FAHP and sub-factors weight was distributed equally

| Factors #          | Relevant factors and Indicators under them                                                                     | Indicator relationship with score | Weight (%)    | Score of individual watercourse states |            |            |            | Estimate of countries weighted share from each indicators |              |              |              |
|--------------------|----------------------------------------------------------------------------------------------------------------|-----------------------------------|---------------|----------------------------------------|------------|------------|------------|-----------------------------------------------------------|--------------|--------------|--------------|
|                    |                                                                                                                |                                   |               | Egypt                                  | Ethiopia   | Sudan      | Total      | Egypt                                                     | Ethiopia     | Sudan        | Total        |
| <b>1</b>           | <b>Natural features</b>                                                                                        |                                   | <b>24.92%</b> |                                        |            |            |            |                                                           |              |              |              |
|                    | SF1 - Basin area in each country [Km2]                                                                         | Direct                            | 2.49%         | 302,452                                | 365,318    | 1,396,230  | 2,064,000  | 0.004                                                     | 0.004        | 0.017        | 0.025        |
|                    | SF1 - The whole area in each country [Km2]                                                                     | Direct                            | 2.49%         | 996,960                                | 1,144,035  | 1,864,049  | 4,005,044  | 0.006                                                     | 0.007        | 0.012        | 0.025        |
|                    | SF2 - River length in each country [Km]                                                                        | Direct                            | 4.98%         | 1,747                                  | 1,146      | 2,307      | 5,200      | 0.017                                                     | 0.011        | 0.022        | 0.050        |
|                    | SF3 - Köppen Aridity Index (Precipitation/Temperature+33) in each country                                      | Reverse                           | 1.66%         | 0.49                                   | 12.89      | 4.26       | 17.64      | 0.014                                                     | 0.001        | 0.002        | 0.017        |
|                    | SF3 - Median Drought vulnerability index                                                                       | Direct                            | 1.66%         | 0.20                                   | 0.72       | 0.61       | 1.53       | 0.002                                                     | 0.008        | 0.007        | 0.017        |
|                    | SF3 - Water-food-energy risk index or [Resilience Index]                                                       | Reverse                           | 1.66%         | 1.51                                   | 2.33       | 2.26       | 6.10       | 0.007                                                     | 0.005        | 0.005        | 0.017        |
|                    | SF4 - Annual surface water contribution of each countries [Bm3/year]                                           | Direct                            | 2.49%         | 0.00                                   | 13.70      | 0.00       | 13.70      | 0.000                                                     | 0.025        | 0.000        | 0.025        |
|                    | SF4 - Water stress index[%] in each country                                                                    | Direct                            | 2.49%         | 117.30                                 | 21.72      | 118.60     | 257.62     | 0.011                                                     | 0.002        | 0.011        | 0.025        |
|                    | SF5 - 95% time flow exceeded minimum environmental flow with moderate management class [Mm3/year]              | Direct                            | 1.66%         | 1,233.07                               | 402.00     | 988.58     | 2,623.65   | 0.008                                                     | 0.003        | 0.006        | 0.017        |
|                    | SF5 - Total greenhouse gas emissions (kt of CO2 equivalent) in each country                                    | Reverse                           | 1.66%         | 295,500                                | 185,292    | 491,982    | 972,774    | 0.005                                                     | 0.008        | 0.003        | 0.017        |
|                    | SF5 - Environmental performance index in each country                                                          | Direct                            | 1.66%         | 43.30                                  | 34.40      | 34.80      | 112.50     | 0.006                                                     | 0.005        | 0.005        | 0.017        |
| <b>2</b>           | <b>Social and economic needs of the watercourse States concerned</b>                                           |                                   | <b>15.57%</b> |                                        |            |            |            |                                                           |              |              | 0.000        |
|                    | SF8 - GDP per capita in each country [Current \$]                                                              | Reverse                           | 0.49%         | 3,020.00                               | 750.00     | 780.60     | 4,550.60   | 0.001                                                     | 0.002        | 0.002        | 0.005        |
|                    | SF8 - Gross National income per capita in each country [\$]                                                    | Reverse                           | 0.49%         | 11,350.00                              | 2,110.00   | 4,430.00   | 17,890.00  | 0.001                                                     | 0.003        | 0.001        | 0.005        |
|                    | SF8 - Exports and imports trade (% of GDP)                                                                     | Reverse                           | 0.49%         | 48.28                                  | 34.35      | 22.59      | 105.22     | 0.001                                                     | 0.002        | 0.002        | 0.005        |
|                    | SF8 - Income index                                                                                             | Reverse                           | 0.49%         | 0.71                                   | 0.43       | 0.56       | 1.69       | 0.001                                                     | 0.002        | 0.002        | 0.005        |
|                    | SF9 - Unemployment in the basin in each country [%]                                                            | Direct                            | 0.97%         | 10.80                                  | 4.32       | 16.50      | 31.62      | 0.003                                                     | 0.001        | 0.005        | 0.010        |
|                    | SF9 - Vulnerable employment (% of total employment)                                                            | Direct                            | 0.97%         | 21.00                                  | 86.00      | 50.00      | 157.00     | 0.001                                                     | 0.005        | 0.003        | 0.010        |
|                    | SF10 - Population with access to electricity [%]                                                               | Reverse                           | 0.32%         | 100.00                                 | 47.30      | 59.80      | 207.10     | 0.001                                                     | 0.001        | 0.001        | 0.003        |
|                    | SF10 - Relative significance of hydropower in each Nile basin countries[%]                                     | Direct                            | 0.32%         | 12.00                                  | 95.00      | 49.00      | 156.00     | 0.000                                                     | 0.002        | 0.001        | 0.003        |
|                    | SF10 - Population using basic drinking-water supply [%]                                                        | Reverse                           | 0.32%         | 99.00                                  | 46.50      | 60.00      | 205.50     | 0.001                                                     | 0.001        | 0.001        | 0.003        |
|                    | SF10 - People with access to clean cooking [%]                                                                 | Reverse                           | 0.32%         | 98.00                                  | 10.16      | 41.00      | 149.16     | 0.000                                                     | 0.002        | 0.001        | 0.003        |
|                    | SF10 - Water supply and sanitation index                                                                       | Reverse                           | 0.32%         | 98.90                                  | 41.39      | 66.80      | 207.08     | 0.001                                                     | 0.002        | 0.001        | 0.003        |
|                    | SF10 - Infrastructure development index                                                                        | Reverse                           | 0.32%         | 88.39                                  | 9.63       | 17.16      | 115.18     | 0.000                                                     | 0.002        | 0.001        | 0.003        |
|                    | SF11 - Human Development Index (HDI) in each country [%]                                                       | Reverse                           | 1.95%         | 0.70                                   | 0.45       | 0.51       | 1.66       | 0.005                                                     | 0.008        | 0.007        | 0.019        |
|                    | SF12 - Multidimensional Poverty index                                                                          | Direct                            | 0.65%         | 0.02                                   | 0.49       | 0.28       | 0.79       | 0.000                                                     | 0.004        | 0.002        | 0.006        |
|                    | SF12 - Population living below income poverty line [%]                                                         | Direct                            | 0.65%         | 1.30                                   | 27.30      | 14.90      | 43.50      | 0.000                                                     | 0.004        | 0.002        | 0.006        |
|                    | SF12 - Hunger Index                                                                                            | Direct                            | 0.65%         | 14.60                                  | 26.05      | 32.80      | 73.45      | 0.001                                                     | 0.002        | 0.003        | 0.006        |
|                    | SF13 - Education index                                                                                         | Reverse                           | 1.95%         | 0.61                                   | 0.30       | 0.34       | 1.25       | 0.004                                                     | 0.008        | 0.007        | 0.019        |
|                    | SF14 - Life expectancy Index                                                                                   | Reverse                           | 1.95%         | 71.66                                  | 65.71      | 64.70      | 202.06     | 0.006                                                     | 0.007        | 0.007        | 0.019        |
|                    | SF15 - Gender Development Index (GDI) in each country [%]                                                      | Reverse                           | 1.95%         | 0.88                                   | 0.84       | 0.84       | 2.56       | 0.006                                                     | 0.007        | 0.007        | 0.019        |
| <b>3</b>           | <b>The population dependent on the watercourse in each watercourse state</b>                                   |                                   | <b>11.21%</b> |                                        |            |            |            |                                                           |              |              | 0.000        |
|                    | SF16 - Population in the Nile basin countries [in millions] in 2019                                            | Direct                            | 1.87%         | 100.39                                 | 115.29     | 42.81      | 258.49     | 0.007                                                     | 0.008        | 0.003        | 0.019        |
|                    | SF16 - Population living in the basin in each country [%]                                                      | Direct                            | 1.87%         | 93.77                                  | 0.40       | 86.98      | 181.15     | 0.010                                                     | 0.000        | 0.009        | 0.019        |
|                    | SF16 - Population growth rate [%]                                                                              | Direct                            | 1.87%         | 2.03                                   | 1.99       | 2.39       | 6.42       | 0.006                                                     | 0.006        | 0.007        | 0.019        |
|                    | SF16 - Employment in agriculture (% of total employment)                                                       | Direct                            | 1.87%         | 24.00                                  | 63.50      | 40.00      | 127.50     | 0.004                                                     | 0.009        | 0.006        | 0.019        |
|                    | SF16 - Employment in marine and inland fisheries [No]                                                          | Direct                            | 1.87%         | 796,400.0                              | 23,365.00  | 17,400.00  | 837,165.00 | 0.018                                                     | 0.001        | 0.000        | 0.019        |
|                    | SF16 - Agriculture, forestry, and fishing, value added (% of GDP)                                              | Direct                            | 1.87%         | 11.00                                  | 24.01      | 28.40      | 63.41      | 0.003                                                     | 0.007        | 0.008        | 0.019        |
| <b>4</b>           | <b>The effects of the use or uses of the watercourses in one watercourse State on other watercourse states</b> |                                   | <b>25.62%</b> |                                        |            |            |            |                                                           |              |              | 0.000        |
|                    | SF17 - Fertile soil loss by erosion or sediment yield per year [Million tons/year]                             | Direct                            | 8.54%         | 0.00                                   | 145.37     | 0.00       | 145.37     | 0.000                                                     | 0.085        | 0.000        | 0.085        |
|                    | SF18 - Average annual surface water volumetric reliability index [%]                                           | Reverse                           | 8.54%         | 0.80                                   | 1.00       | 1.00       | 2.80       | 0.033                                                     | 0.026        | 0.026        | 0.085        |
|                    | SF19 - Water quality index                                                                                     | Direct                            | 8.54%         | 77.98                                  | 55.27      | 67.04      | 200.29     | 0.033                                                     | 0.024        | 0.029        | 0.085        |
| <b>5</b>           | <b>Existing and potential uses of the watercourse</b>                                                          |                                   | <b>10.57%</b> |                                        |            |            |            |                                                           |              |              | 0.000        |
|                    | SF20 - Gross Irrigation water demand in each basin countries [Bm3/yr]                                          | Direct                            | 1.32%         | 57.07                                  | 2.02       | 13.32      | 72.41      | 0.010                                                     | 0.000        | 0.002        | 0.013        |
|                    | SF20 - Potential irrigation remaining area in each basin country [Hectare]                                     | Direct                            | 1.76%         | 820,000                                | 2,566,000  | 735,000    | 4,121,000  | 0.004                                                     | 0.011        | 0.003        | 0.018        |
|                    | [Bm3/year]                                                                                                     | Direct                            | 1.32%         | 10.20                                  | 0.19       | 0.29       | 10.68      | 0.013                                                     | 0.000        | 0.000        | 0.013        |
|                    | SF20 - Projected domestic water demand by 2050 in each basin countries [Bm3/year]                              | Direct                            | 1.76%         | 13.14                                  | 2.43       | 2.87       | 18.44      | 0.013                                                     | 0.002        | 0.003        | 0.018        |
|                    | SF20 - Energy Consumption per Capita (Kg of oil equivalent per capita)                                         | Direct                            | 1.32%         | 913.06                                 | 328.17     | 342.13     | 1,583.36   | 0.008                                                     | 0.003        | 0.003        | 0.013        |
|                    | SF20 - Existing Hydropower production in the basin in each country[MW]                                         | Direct                            | 1.32%         | 2,862.00                               | 1,946.00   | 1,593.00   | 6,401.00   | 0.006                                                     | 0.004        | 0.003        | 0.013        |
|                    | country[MW]                                                                                                    | Direct                            | 1.76%         | 40.00                                  | 455.00     | 3,280.00   | 3,775.00   | 0.000                                                     | 0.002        | 0.015        | 0.018        |
| <b>6</b>           | <b>Conservation, protection, development and economy of uses and the costs of measures taken</b>               |                                   | <b>8.16%</b>  |                                        |            |            |            |                                                           |              |              | 0.000        |
|                    | SF21 - Areas exposed for severe soil erosion in each country with a rate of (>80kg/ha/yr) [Km2]                | Direct                            | 2.04%         | 0.00                                   | 39,375.00  | 0.00       | 39,375.00  | 0.000                                                     | 0.020        | 0.000        | 0.020        |
|                    | SF22 - Loss of water by evaporation from dams in each basin countries [BCM/year]                               | Reverse                           | 1.02%         | 12.58                                  | 0.18       | 4.56       | 17.32      | 0.000                                                     | 0.010        | 0.000        | 0.010        |
|                    | SF22 - Water use efficiency [USD/m3]                                                                           | Direct                            | 1.02%         | 3.80                                   | 1.90       | 1.60       | 7.30       | 0.005                                                     | 0.003        | 0.002        | 0.010        |
|                    | SF22 - Wetland area [Km2]                                                                                      | Direct                            | 1.02%         | 426.00                                 | 2,828.70   | 10,846.00  | 14,100.70  | 0.000                                                     | 0.002        | 0.008        | 0.010        |
|                    | SF22 - Cereal yield (kg per hectare)                                                                           | Direct                            | 1.02%         | 72,525.00                              | 14,095.00  | 5,895.00   | 92,515.00  | 0.008                                                     | 0.002        | 0.001        | 0.010        |
|                    | SF23 - Gross investment made on hydraulic structures or Dams [million USD]                                     | Direct                            | 1.02%         | 1.00                                   | 7.39       | 4.38       | 12.77      | 0.001                                                     | 0.006        | 0.003        | 0.010        |
|                    | SF23 - Total agricultural export value (1000)                                                                  | Reverse                           | 1.02%         | 4,056,931                              | 1,187,241  | 551,613    | 5,795,785  | 0.001                                                     | 0.003        | 0.006        | 0.010        |
| <b>7</b>           | <b>The availability of alternatives, of comparable value</b>                                                   |                                   | <b>3.95%</b>  |                                        |            |            |            |                                                           |              |              | 0.000        |
|                    | SF24 - Alternative energy source from Solar(both PV and CSP) [TWh/year]                                        | Reverse                           | 0.003         | 58,823.0                               | 33,973.5   | 165,239.0  | 258,035.5  | 0.001                                                     | 0.002        | 0.000        | 0.003        |
|                    | SF24 - Alternative energy source from Wind [TWh/year]                                                          | Reverse                           | 0.003         | 36,601.0                               | 19,877.5   | 61,661.0   | 118,139.5  | 0.001                                                     | 0.002        | 0.000        | 0.003        |
|                    | SF24 - Alternative energy source from Geothermal [MW]                                                          | Reverse                           | 0.003         | 0.00                                   | 5,000.00   | 0.00       | 5,000.00   | 0.001                                                     | 0.000        | 0.001        | 0.003        |
|                    | SF24 - Alternative energy source from oil [proved oil reserves in thousand million barrels]                    | Reverse                           | 0.003         | 3.47                                   | 0.00       | 1.50       | 4.97       | 0.000                                                     | 0.002        | 0.001        | 0.003        |
|                    | SF24 - Alternative energy source from natural gas [proved reserves trillion cubic metres]                      | Reverse                           | 0.003         | 1.85                                   | 0.00       | 0.00       | 1.85       | 0.000                                                     | 0.001        | 0.001        | 0.003        |
|                    | [GWh]                                                                                                          | Reverse                           | 0.003         | 287,088.0                              | 27,670.5   | 107,020.0  | 421,778.5  | 0.000                                                     | 0.002        | 0.001        | 0.003        |
|                    | SF24 - Total Renewable ground water resource[BCM/yr]                                                           | Reverse                           | 0.003         | 1.50                                   | 10.25      | 3.00       | 14.75      | 0.002                                                     | 0.000        | 0.001        | 0.003        |
|                    | SF25 - Average income from Tourism [Million US\$]                                                              | Reverse                           | 0.004         | 6,900.35                               | 534.06     | 1,029.00   | 8,463.41   | 0.000                                                     | 0.002        | 0.001        | 0.004        |
|                    | SF25 - Alternative source of food and income from Livestock resource                                           | -                                 | 0.004         |                                        |            |            |            | 0.000                                                     | 0.000        | 0.000        | 0.000        |
|                    | - Cattle [Head]                                                                                                | Reverse                           | 0.001         | 5,064,509                              | 31,516,797 | 30,734,061 | 67,315,367 | 0.001                                                     | 0.000        | 0.000        | 0.001        |
|                    | - Sheep [Head]                                                                                                 | Reverse                           | 0.001         | 5,697,716                              | 17,122,966 | 40,573,686 | 63,394,368 | 0.001                                                     | 0.000        | 0.000        | 0.001        |
|                    | - Chicken [1000 Head]                                                                                          | Reverse                           | 0.001         | 156,453                                | 30,420     | 48,299     | 235,172    | 0.000                                                     | 0.000        | 0.000        | 0.001        |
|                    | - Goat [Head]                                                                                                  | Reverse                           | 0.001         | 4,351,545                              | 16,261,299 | 31,443,790 | 52,056,634 | 0.001                                                     | 0.000        | 0.000        | 0.001        |
|                    | - Beehives[No]                                                                                                 | Reverse                           | 0.001         | 877,637                                | 3,069,995  | 76,095     | 4,023,727  | 0.000                                                     | 0.000        | 0.001        | 0.001        |
|                    | SF25 - 55 years average fish and aquaculture production [ metric ton/yr]                                       | Reverse                           | 0.004         | 732,456                                | 8,496      | 38,080     | 779,032    | 0.000                                                     | 0.003        | 0.001        | 0.004        |
|                    | SF25 - Industry value added (%GDP)- including construction industry                                            | Reverse                           | 0.004         | 35.08                                  | 24.54      | 2.38       | 62.00      | 0.000                                                     | 0.000        | 0.003        | 0.004        |
|                    | SF25 - Employment in service provision sector [% of total employment]                                          | Reverse                           | 0.004         | 48.55                                  | 25.41      | 41.86      | 115.82     | 0.001                                                     | 0.002        | 0.001        | 0.004        |
| <b>Total share</b> |                                                                                                                |                                   |               |                                        |            |            |            | <b>0.305</b>                                              | <b>0.396</b> | <b>0.299</b> | <b>1.000</b> |

**Table S7:** A sample calculation of riparian countries water apportionment from the Baro-Akobo-Sobat sub-basin in which factors are weighted by FAHP and sub-factors weight was distributed equally

| Factor #           | Relevant factors and Indicators under them                                                                     | Indicator relationship with score | Weight (%)    | Score of individual watercourse states |             |             |             | Estimate of countries weighted share from each indicators |              |              |              |
|--------------------|----------------------------------------------------------------------------------------------------------------|-----------------------------------|---------------|----------------------------------------|-------------|-------------|-------------|-----------------------------------------------------------|--------------|--------------|--------------|
|                    |                                                                                                                |                                   |               | Egypt                                  | Ethiopia    | Sudans      | Total       | Egypt                                                     | Ethiopia     | Sudans       | Total        |
| <b>1</b>           | <b>Natural features</b>                                                                                        |                                   | <b>24.92%</b> |                                        |             |             |             |                                                           |              |              |              |
|                    | SF1 - Basin area in each country [Km2]                                                                         | Direct                            | 2 49%         | 302,452 0                              | 365,318 0   | 2,016,856 0 | 2,684,626 0 | 0 003                                                     | 0 003        | 0 019        | 0 025        |
|                    | SF1 - The whole area in each country [Km2]                                                                     | Direct                            | 2 49%         | 996,960 0                              | 1,144,035 0 | 2,508,378 0 | 4,649,373 0 | 0 005                                                     | 0 006        | 0 013        | 0 025        |
|                    | SF2 - River length in each country [Km]                                                                        | Direct                            | 4 98%         | 1,746 82                               | 838 34      | 1,427 72    | 4,012 88    | 0 022                                                     | 0 010        | 0 018        | 0 050        |
|                    | SF3 - Köppen Aridity Index (Precipitation/Temperature+33) in each country                                      | Reverse                           | 1 66%         | 0 49                                   | 20 97       | 10 43       | 31 89       | 0 016                                                     | 0 000        | 0 001        | 0 017        |
|                    | SF3 - Median Drought vulnerability index                                                                       | Direct                            | 1 66%         | 0 20                                   | 0 72        | 0 61        | 1 53        | 0 002                                                     | 0 008        | 0 007        | 0 017        |
|                    | SF3 - Water-food-energy risk index or [Resilience Index]                                                       | Reverse                           | 1 66%         | 1 51                                   | 2 94        | 2 06        | 6 51        | 0 007                                                     | 0 004        | 0 005        | 0 017        |
|                    | SF4 - Annual surface water contribution of each countries [Bm3/year]                                           | Direct                            | 2 49%         | 0 00                                   | 12 43       | 0 00        | 12 43       | 0 000                                                     | 0 025        | 0 000        | 0 025        |
|                    | SF4 - Water stress index[%] in each country                                                                    | Direct                            | 2 49%         | 117 30                                 | 32 26       | 118 60      | 268 16      | 0 011                                                     | 0 003        | 0 011        | 0 025        |
|                    | management class [Mm3/year]                                                                                    | Direct                            | 1 66%         | 1,233 07                               | 423 50      | 497 51      | 2,154 08    | 0 010                                                     | 0 003        | 0 004        | 0 017        |
|                    | SF5 - Total greenhouse gas emissions (kt of CO2 equivalent) in each country                                    | Reverse                           | 1 66%         | 295,499 75                             | 185,292 17  | 491,982 27  | 972,774 18  | 0 005                                                     | 0 008        | 0 003        | 0 017        |
|                    | SF5 - Environmental performance index in each country                                                          | Direct                            | 1 66%         | 43 30                                  | 34 40       | 34 80       | 112 50      | 0 006                                                     | 0 005        | 0 005        | 0 017        |
| <b>2</b>           | <b>Social and economic needs of the watercourse States concerned</b>                                           |                                   | <b>15.57%</b> |                                        |             |             |             |                                                           |              |              |              |
|                    | SF8 - GDP per capita in each country [Current \$]                                                              | Reverse                           | 0 49%         | 3,020 00                               | 857 50      | 780 60      | 4,658 10    | 0 001                                                     | 0 002        | 0 002        | 0 005        |
|                    | SF8 - Gross National income per capita in each country [\$]                                                    | Reverse                           | 0 49%         | 11,350 00                              | 2,140 00    | 2,885 00    | 16,375 00   | 0 000                                                     | 0 003        | 0 002        | 0 005        |
|                    | SF8 - Exports and imports trade (% of GDP)                                                                     | Reverse                           | 0 49%         | 48 28                                  | 31 17       | 38 38       | 117 82      | 0 001                                                     | 0 002        | 0 002        | 0 005        |
|                    | SF8 - Income index                                                                                             | Reverse                           | 0 49%         | 0 71                                   | 0 44        | 0 48        | 1 62        | 0 001                                                     | 0 002        | 0 002        | 0 005        |
|                    | SF9 - Unemployment in the basin in each country [%]                                                            | Direct                            | 0 97%         | 10 80                                  | 2 10        | 14 35       | 27 25       | 0 004                                                     | 0 001        | 0 005        | 0 010        |
|                    | SF9 - Vulnerable employment (% of total employment)                                                            | Direct                            | 0 97%         | 21 00                                  | 86 00       | 67 50       | 174 50      | 0 001                                                     | 0 005        | 0 004        | 0 010        |
|                    | SF10 - Population with access to electricity [%]                                                               | Reverse                           | 0 32%         | 100 00                                 | 45 00       | 44 00       | 189 00      | 0 001                                                     | 0 001        | 0 001        | 0 003        |
|                    | SF10 - Relative significance of hydropower in each Nile basin countries[%]                                     | Direct                            | 0 32%         | 12 00                                  | 95 00       | 49 00       | 156 00      | 0 000                                                     | 0 002        | 0 001        | 0 003        |
|                    | SF10 - Population using basic drinking-water supply [%]                                                        | Reverse                           | 0 32%         | 99 00                                  | 41 00       | 50 50       | 190 50      | 0 001                                                     | 0 001        | 0 001        | 0 003        |
|                    | SF10 - People with access to clean cooking [%]                                                                 | Reverse                           | 0 32%         | 98 00                                  | 4 00        | 21 00       | 123 00      | 0 000                                                     | 0 003        | 0 001        | 0 003        |
|                    | SF10 - Water supply and sanitation index                                                                       | Reverse                           | 0 32%         | 98 90                                  | 39 74       | 56 35       | 194 98      | 0 001                                                     | 0 002        | 0 001        | 0 003        |
|                    | SF10 - Infrastructure development index                                                                        | Reverse                           | 0 32%         | 88 39                                  | 10 49       | 11 22       | 110 10      | 0 000                                                     | 0 002        | 0 001        | 0 003        |
|                    | SF11 - Human Development Index (HDI) in each country [%]                                                       | Reverse                           | 1 95%         | 0 70                                   | 0 47        | 0 46        | 1 63        | 0 005                                                     | 0 007        | 0 007        | 0 019        |
|                    | SF12 - Multidimensional Poverty index                                                                          | Direct                            | 0 65%         | 0 02                                   | 0 49        | 0 43        | 0 94        | 0 000                                                     | 0 003        | 0 003        | 0 006        |
|                    | SF12 - Population living below income poverty line [%]                                                         | Direct                            | 0 65%         | 1 30                                   | 27 30       | 28 80       | 57 40       | 0 000                                                     | 0 003        | 0 003        | 0 006        |
|                    | SF12 - Hunger Index                                                                                            | Direct                            | 0 65%         | 14 60                                  | 28 90       | 32 80       | 76 30       | 0 001                                                     | 0 002        | 0 003        | 0 006        |
|                    | SF13 - Education index                                                                                         | Reverse                           | 1 95%         | 0 61                                   | 0 34        | 0 32        | 1 26        | 0 004                                                     | 0 007        | 0 008        | 0 019        |
|                    | SF14 - Life expectancy Index                                                                                   | Reverse                           | 1 95%         | 71 66                                  | 65 87       | 60 99       | 198 53      | 0 006                                                     | 0 006        | 0 007        | 0 019        |
|                    | SF15 - Gender Development Index (GDI) in each country [%]                                                      | Reverse                           | 1 95%         | 0 88                                   | 0 84        | 0 84        | 2 56        | 0 006                                                     | 0 007        | 0 007        | 0 019        |
| <b>3</b>           | <b>The population dependent on the watercourse in each watercourse state</b>                                   |                                   | <b>11.21%</b> |                                        |             |             |             |                                                           |              |              |              |
|                    | SF16 - Population in the Nile basin countries [in millions] in 2019                                            | Direct                            | 1 87%         | 100 39                                 | 112 08      | 53 88       | 266 34      | 0 007                                                     | 0 008        | 0 004        | 0 019        |
|                    | SF16 - Population living in the basin in each country [%]                                                      | Direct                            | 1 87%         | 93 77                                  | 37 83       | 0 93        | 132 53      | 0 013                                                     | 0 005        | 0 000        | 0 019        |
|                    | SF16 - Population growth rate [%]                                                                              | Direct                            | 1 87%         | 2 03                                   | 2 62        | 1 49        | 6 15        | 0 006                                                     | 0 008        | 0 005        | 0 019        |
|                    | SF16 - Employment in agriculture (% of total employment)                                                       | Direct                            | 1 87%         | 24 00                                  | 66 00       | 48 50       | 138 50      | 0 003                                                     | 0 009        | 0 007        | 0 019        |
|                    | SF16 - Employment in marine and inland fisheries [No]                                                          | Direct                            | 1 87%         | 796,400 00                             | 23,365 00   | 20,880 00   | 840,645 00  | 0 018                                                     | 0 001        | 0 000        | 0 019        |
|                    | SF16 - Agriculture, forestry, and fishing, value added (% of GDP)                                              | Direct                            | 1 87%         | 11 00                                  | 33 90       | 20 15       | 65 05       | 0 003                                                     | 0 010        | 0 006        | 0 019        |
| <b>4</b>           | <b>The effects of the use or uses of the watercourses in one watercourse State on other watercourse states</b> |                                   | <b>25.62%</b> |                                        |             |             |             |                                                           |              |              |              |
|                    | SF17 - Fertile soil loss by erosion or sediment yield per year [Million tons/year]                             | Direct                            | 8 54%         | 0 00                                   | 14 60       | 0 00        | 14 60       | 0 000                                                     | 0 085        | 0 000        | 0 085        |
|                    | SF18 - Average annual surface water volumetric reliability index [%]                                           | Reverse                           | 8 54%         | 0 81                                   | 1 00        | 1 00        | 2 81        | 0 033                                                     | 0 026        | 0 026        | 0 085        |
|                    | SF19 - Water quality index                                                                                     | Direct                            | 8 54%         | 77 98                                  | 55 27       | 67 04       | 200 29      | 0 033                                                     | 0 024        | 0 029        | 0 085        |
| <b>5</b>           | <b>Existing and potential uses of the watercourse</b>                                                          |                                   | <b>10.57%</b> |                                        |             |             |             |                                                           |              |              |              |
|                    | SF20 - Gross Irrigation water demand in each basin countries [Bm3/yr]                                          | Direct                            | 1 32%         | 57 07                                  | 2 02        | 13 33       | 72 42       | 0 010                                                     | 0 000        | 0 002        | 0 013        |
|                    | SF20 - Potential irrigation remaining area in each basin country [Hectare]                                     | Direct                            | 1 76%         | 820,000                                | 2,566,000   | 2,234,500   | 5,620,500   | 0 004                                                     | 0 012        | 0 002        | 0 018        |
|                    | [Bm3/year]                                                                                                     | Direct                            | 1 32%         | 10 20                                  | 0 19        | 2 98        | 13 37       | 0 010                                                     | 0 000        | 0 003        | 0 013        |
|                    | SF20 - Projected domestic water demand by 2050 in each basin countries [Bm3/year]                              | Direct                            | 1 76%         | 13 14                                  | 2 43        | 3 10        | 18 67       | 0 012                                                     | 0 002        | 0 003        | 0 018        |
|                    | SF20 - Energy Consumption per Capita (Kg of oil equivalent per capita)                                         | Direct                            | 1 32%         | 913 06                                 | 493 47      | 342 13      | 1,748 66    | 0 007                                                     | 0 004        | 0 003        | 0 013        |
|                    | SF20 - Existing Hydropower production in the basin in each country[MW]                                         | Direct                            | 1 32%         | 2,862 00                               | 1,946 00    | 1,591 60    | 6,399 60    | 0 006                                                     | 0 004        | 0 003        | 0 013        |
|                    | SF20 - Remaining potential Hydropower production in the basin in each country[MW]                              | Direct                            | 1 76%         | 40 00                                  | 3,371 00    | 5,851 40    | 9,262 40    | 0 000                                                     | 0 006        | 0 011        | 0 018        |
| <b>6</b>           | <b>Conservation, protection, development and economy of uses and the costs of measures taken</b>               |                                   | <b>8.16%</b>  |                                        |             |             |             |                                                           |              |              |              |
|                    | SF21 - Areas exposed for severe soil erosion in each country with a rate of (>80kg/ha/yr) [Km2]                | Direct                            | 2 04%         | 0 00                                   | 39,375 00   | 0 00        | 39,375 00   | 0 000                                                     | 0 020        | 0 000        | 0 020        |
|                    | SF22 - Loss of water by evaporation from dams in each basin countries [BCM/year]                               | Reverse                           | 1 02%         | 12 58                                  | 0 18        | 4 56        | 17 32       | 0 000                                                     | 0 006        | 0 004        | 0 010        |
|                    | SF22 - Water use efficiency [USD/m3]                                                                           | Direct                            | 1 02%         | 3 80                                   | 1 90        | 1 60        | 7 30        | 0 005                                                     | 0 003        | 0 002        | 0 010        |
|                    | SF22 - Wetland area [Km2]                                                                                      | Direct                            | 1 02%         | 426 00                                 | 2,828 70    | 69,058 30   | 72,313 00   | 0 000                                                     | 0 000        | 0 010        | 0 010        |
|                    | SF22 - Cereal yield (kg per hectare)                                                                           | Direct                            | 1 02%         | 72,525 00                              | 22,167 00   | 5,895 00    | 100,587 00  | 0 007                                                     | 0 002        | 0 001        | 0 010        |
|                    | SF23 - Gross investment made on hydraulic structures or Dams [million USD]                                     | Direct                            | 1 02%         | 1 00                                   | 7 39        | 4 38        | 12 77       | 0 001                                                     | 0 006        | 0 003        | 0 010        |
|                    | SF23 - Total agricultural export value (1000)                                                                  | Reverse                           | 1 02%         | 4,056,931                              | 2,373,603   | 551,613,000 | 558,043,534 | 0 004                                                     | 0 006        | 0 000        | 0 010        |
| <b>7</b>           | <b>The availability of alternatives, of comparable value</b>                                                   |                                   | <b>3.95%</b>  |                                        |             |             |             |                                                           |              |              |              |
|                    | SF24 - Alternative energy source from Solar(both PV and CSP) [TWh/year]                                        | Reverse                           | 0 003         | 58,823 00                              | 50,113 00   | 165,239 00  | 274,175 00  | 0 001                                                     | 0 001        | 0 000        | 0 003        |
|                    | SF24 - Alternative energy source from Wind [TWh/year]                                                          | Reverse                           | 0 003         | 36,601 00                              | 14,838 00   | 61,661 00   | 113,100 00  | 0 001                                                     | 0 002        | 0 000        | 0 003        |
|                    | SF24 - Alternative energy source from Geothermal [MW]                                                          | Reverse                           | 0 003         | 0 00                                   | 10,000 00   | 0 00        | 10,000 00   | 0 001                                                     | 0 000        | 0 001        | 0 003        |
|                    | SF24 - Alternative energy source from oil [proved oil reserves in thousand million barrels]                    | Reverse                           | 0 003         | 3 47                                   | 0 00        | 5 00        | 8 47        | 0 001                                                     | 0 002        | 0 000        | 0 003        |
|                    | SF24 - Alternative energy source from natural gas [proved reserves trillion cubic m tres]                      | Reverse                           | 0 003         | 1 85                                   | 0 00        | 0 00        | 1 85        | 0 000                                                     | 0 001        | 0 001        | 0 003        |
|                    | [GWh]                                                                                                          | Reverse                           | 0 003         | 287,088 00                             | 49,946 00   | 107,020 00  | 444,054 00  | 0 000                                                     | 0 002        | 0 001        | 0 003        |
|                    | SF24 - Total Renewable ground water resource[BCM/yr]                                                           | Reverse                           | 0 003         | 1 50                                   | 20 00       | 3 50        | 25 00       | 0 002                                                     | 0 000        | 0 001        | 0 003        |
|                    | SF25 - Average income from Tourism [Million US\$]                                                              | Reverse                           | 0 004         | 6,900 35                               | 1,010 87    | 527 50      | 8,438 72    | 0 000                                                     | 0 001        | 0 002        | 0 004        |
|                    | SF25 - Alternative source of food and income from Livestock resource                                           | 0 004                             | 0             | 0                                      | 0           | 0           | 0           | 0 000                                                     | 0 000        | 0 000        | 0 000        |
|                    | - Cattle [Head]                                                                                                | Reverse                           | 0 001         | 5,064,509                              | 60,926,913  | 21,285,781  | 87,277,203  | 0 001                                                     | 0 000        | 0 000        | 0 001        |
|                    | - Sheep [Head]                                                                                                 | Reverse                           | 0 001         | 5,697,716                              | 31,836,701  | 29,198,500  | 66,732,917  | 0 001                                                     | 0 000        | 0 000        | 0 001        |
|                    | - Chicken [1000 Head]                                                                                          | Reverse                           | 0 001         | 156,453                                | 59,489      | 31,650      | 247,592     | 0 000                                                     | 0 000        | 0 000        | 0 001        |
|                    | - Goat [Head]                                                                                                  | Reverse                           | 0 001         | 4,351,545                              | 30,719,382  | 22,504,212  | 57,575,139  | 0 001                                                     | 0 000        | 0 000        | 0 001        |
|                    | - Beehives[No]                                                                                                 | Reverse                           | 0 001         | 877,637                                | 6,139,990   | 76,095      | 7,093,722   | 0 000                                                     | 0 000        | 0 001        | 0 001        |
|                    | SF25 - 55 years average fish and aquaculture production [ metric ton/yr]                                       | Reverse                           | 0 004         | 732,456                                | 12,314      | 37,360      | 782,129     | 0 000                                                     | 0 003        | 0 001        | 0 004        |
|                    | SF25 - Industry value added (%GDP)- including construction industry                                            | Reverse                           | 0 004         | 35 08                                  | 27 26       | 11 50       | 73 84       | 0 001                                                     | 0 001        | 0 002        | 0 004        |
|                    | SF25 - Employment in service provision sector [% of total employment]                                          | Reverse                           | 0 004         | 48 55                                  | 21 80       | 38 43       | 108 78      | 0 001                                                     | 0 002        | 0 001        | 0 004        |
| <b>Total share</b> |                                                                                                                |                                   |               |                                        |             |             |             | <b>0.314</b>                                              | <b>0.402</b> | <b>0.284</b> | <b>1.000</b> |

**Table S8:** A sample calculation of Riparian countries water apportionment from the White Nile Sub-Basin in which factors are weighted by FAHP and sub-factor weight was distributed equally

| Factors #          | Relevant factors and Indicators                                                                                | Indicator relationship with score | Weights (%)   | Score of individual watercourse states |                     |                   |             | Estimate of countries weighted water share from each indicators |                     |                   |              |
|--------------------|----------------------------------------------------------------------------------------------------------------|-----------------------------------|---------------|----------------------------------------|---------------------|-------------------|-------------|-----------------------------------------------------------------|---------------------|-------------------|--------------|
|                    |                                                                                                                |                                   |               | Egypt                                  | Sudan & South Sudan | Equatorial states | Total       | Egypt                                                           | Sudan & South Sudan | Equatorial states | Total        |
| <b>1</b>           | <b>Natural features</b>                                                                                        |                                   | <b>24.92%</b> |                                        |                     |                   |             |                                                                 |                     |                   |              |
|                    | Basin area in each country [Km2]                                                                               | Direct                            | 2.49%         | 302,452.0                              | 2,016,856.00        | 466,218.00        | 2,785,526.0 | 0.003                                                           | 0.018               | 0.004             | 0.025        |
|                    | The whole area in each country [Km2]                                                                           | Direct                            | 2.49%         | 996,960.0                              | 2,508,378.00        | 4,178,946.0       | 7,684,284.0 | 0.003                                                           | 0.008               | 0.014             | 0.025        |
|                    | River length in each country [Km]                                                                              | Direct                            | 4.98%         | 1,746.82                               | 3,657.14            | 969.36            | 6,373.32    | 0.014                                                           | 0.029               | 0.008             | 0.050        |
|                    | Köppen Aridity Index (Precipitation/Temperature+33) in each country                                            | Reverse                           | 1.66%         | 0.49                                   | 10.43               | 20.46             | 31.38       | 0.016                                                           | 0.001               | 0.000             | 0.017        |
|                    | Median Drought vulnerability index                                                                             | Direct                            | 1.66%         | 0.20                                   | 0.61                | 0.65              | 1.46        | 0.002                                                           | 0.007               | 0.007             | 0.017        |
|                    | Water-food-energy risk index or [Resilience Index]                                                             | Reverse                           | 1.66%         | 1.51                                   | 2.06                | 2.76              | 6.34        | 0.007                                                           | 0.005               | 0.004             | 0.017        |
|                    | Annual surface water contribution of each countries [Bm3/year]                                                 | Direct                            | 2.49%         | 0.00                                   | 0.00                | 31.30             | 31.30       | 0.000                                                           | 0.000               | 0.025             | 0.025        |
|                    | Water stress index[%] in each country                                                                          | Direct                            | 2.49%         | 117.30                                 | 61.41               | 10.16             | 188.88      | 0.015                                                           | 0.008               | 0.001             | 0.025        |
|                    | 95% time flow exceeded minimum environmental flow with moderate management class [Mm3/year]                    | Direct                            | 1.66%         | 620.55                                 | 497.51              | 292.00            | 1,410.06    | 0.007                                                           | 0.006               | 0.003             | 0.017        |
|                    | Total greenhouse gas emissions (kt of CO2 equivalent) in each country                                          | Reverse                           | 1.66%         | 295,499.7                              | 491,982.27          | 197,599.32        | 985,081.33  | 0.005                                                           | 0.003               | 0.008             | 0.017        |
|                    | Environmental performance index in each country                                                                | Direct                            | 1.66%         | 43.30                                  | 34.80               | 33.31             | 111.41      | 0.006                                                           | 0.005               | 0.005             | 0.017        |
| <b>2</b>           | <b>Social and economic needs of the watercourse States concerned</b>                                           |                                   | <b>15.57%</b> |                                        |                     |                   |             |                                                                 |                     |                   | 0.000        |
|                    | GDP per capita in each country [Current \$]                                                                    | Reverse                           | 0.49%         | 3,020.00                               | 780.60              | 887.25            | 4,687.85    | 0.001                                                           | 0.002               | 0.002             | 0.005        |
|                    | Gross National income per capita in each country [\$]                                                          | Reverse                           | 0.49%         | 11,350.00                              | 2,885.00            | 2,183.33          | 16,418.33   | 0.000                                                           | 0.002               | 0.002             | 0.005        |
|                    | Exports and imports trade (% of GDP)                                                                           | Reverse                           | 0.49%         | 48.28                                  | 38.38               | 46.28             | 132.94      | 0.001                                                           | 0.002               | 0.002             | 0.005        |
|                    | Income index                                                                                                   | Reverse                           | 0.49%         | 0.71                                   | 0.48                | 0.42              | 1.60        | 0.001                                                           | 0.002               | 0.002             | 0.005        |
|                    | Unemployment in the basin in each country [%]                                                                  | Direct                            | 0.97%         | 10.80                                  | 14.35               | 2.17              | 27.32       | 0.004                                                           | 0.005               | 0.001             | 0.010        |
|                    | Vulnerable employment (% of total employment)                                                                  | Direct                            | 0.97%         | 21.00                                  | 67.50               | 75.33             | 163.83      | 0.001                                                           | 0.004               | 0.004             | 0.010        |
|                    | Population with access to electricity [%]                                                                      | Reverse                           | 0.32%         | 100.00                                 | 44.00               | 36.32             | 180.32      | 0.001                                                           | 0.001               | 0.001             | 0.003        |
|                    | Relative significance of hydropower in each Nile basin countries[%]                                            | Direct                            | 0.32%         | 12.00                                  | 49.00               | 67.17             | 128.17      | 0.000                                                           | 0.001               | 0.002             | 0.003        |
|                    | Population using basic drinking-water supply [%]                                                               | Reverse                           | 0.32%         | 99.00                                  | 50.50               | 54.50             | 204.00      | 0.001                                                           | 0.001               | 0.001             | 0.003        |
|                    | People with access to clean cooking [%]                                                                        | Reverse                           | 0.32%         | 98.00                                  | 21.00               | 3.70              | 122.70      | 0.000                                                           | 0.000               | 0.003             | 0.003        |
|                    | Water supply and sanitation index                                                                              | Reverse                           | 0.32%         | 98.90                                  | 56.35               | 57.78             | 213.03      | 0.001                                                           | 0.001               | 0.001             | 0.003        |
|                    | Infrastructure development index                                                                               | Reverse                           | 0.32%         | 88.39                                  | 11.22               | 18.20             | 117.81      | 0.000                                                           | 0.002               | 0.001             | 0.003        |
|                    | Human Development Index (HDI) in each country [%]                                                              | Reverse                           | 1.95%         | 0.70                                   | 0.46                | 0.51              | 1.67        | 0.005                                                           | 0.008               | 0.007             | 0.019        |
|                    | Multidimensional Poverty index                                                                                 | Direct                            | 0.65%         | 0.02                                   | 0.43                | 0.30              | 0.74        | 0.000                                                           | 0.004               | 0.003             | 0.006        |
|                    | Population living below income poverty line [%]                                                                | Direct                            | 0.65%         | 1.30                                   | 28.80               | 55.25             | 85.35       | 0.000                                                           | 0.002               | 0.004             | 0.006        |
|                    | Hunger Index                                                                                                   | Direct                            | 0.65%         | 14.60                                  | 32.80               | 28.38             | 75.78       | 0.001                                                           | 0.003               | 0.002             | 0.006        |
|                    | Education index                                                                                                | Reverse                           | 1.95%         | 0.61                                   | 0.32                | 0.47              | 1.40        | 0.005                                                           | 0.009               | 0.006             | 0.019        |
|                    | Life expectancy Index                                                                                          | Reverse                           | 1.95%         | 71.66                                  | 60.99               | 63.19             | 195.85      | 0.006                                                           | 0.007               | 0.007             | 0.019        |
|                    | Gender Development Index (GDI) in each country [%]                                                             | Reverse                           | 1.95%         | 0.88                                   | 0.84                | 0.92              | 2.64        | 0.006                                                           | 0.007               | 0.006             | 0.019        |
| <b>3</b>           | <b>The population dependent on the watercourse in each watercourse state</b>                                   |                                   | <b>11.21%</b> |                                        |                     |                   |             |                                                                 |                     |                   | 0.000        |
|                    | Population in the Nile basin countries [in millions]-2019                                                      | Direct                            | 1.12%         | 100.39                                 | 53.88               | 265.80            | 420.06      | 0.003                                                           | 0.001               | 0.007             | 0.011        |
|                    | Population living in the basin in each country [%]                                                             | Direct                            | 1.12%         | 93.77                                  | 0.93                | 0.50              | 95.20       | 0.011                                                           | 0.000               | 0.000             | 0.011        |
|                    | Population growth rate [%]                                                                                     | Direct                            | 5.60%         | 2.03                                   | 1.49                | 3.01              | 6.53        | 0.017                                                           | 0.013               | 0.026             | 0.056        |
|                    | Employment in agriculture (% of total employment)                                                              | Direct                            | 1.12%         | 24.00                                  | 48.50               | 68.50             | 141.00      | 0.002                                                           | 0.004               | 0.005             | 0.011        |
|                    | Employment in marine and inland fisheries [No]                                                                 | Direct                            | 1.12%         | 796,400.0                              | 20,880.00           | 114,613.17        | 931,893.17  | 0.010                                                           | 0.000               | 0.001             | 0.011        |
|                    | Agriculture, forestry, and fishing, value added (% of GDP)                                                     | Direct                            | 1.12%         | 11.00                                  | 20.15               | 26.28             | 57.44       | 0.002                                                           | 0.004               | 0.005             | 0.011        |
|                    | <b>The effects of the use or uses of the watercourses in one watercourse State on other watercourse states</b> |                                   | <b>25.62%</b> |                                        |                     |                   |             |                                                                 |                     |                   |              |
| <b>4</b>           | <b>Fertile soil loss by erosion or sediment yield per year [Million tons/year]</b>                             | Direct                            | 8.54%         | 0.00                                   | 0.87                | 0.47              | 1.34        | 0.000                                                           | 0.056               | 0.030             | 0.085        |
|                    | Average annual surface water volumetric reliability index [%]                                                  | Reverse                           | 8.54%         | 0.80                                   | 1.00                | 1.00              | 2.80        | 0.033                                                           | 0.026               | 0.026             | 0.085        |
|                    | Water quality index                                                                                            | Direct                            | 8.54%         | 77.98                                  | 67.04               | 62.84             | 207.86      | 0.032                                                           | 0.028               | 0.026             | 0.085        |
| <b>5</b>           | <b>Existing and potential uses of the watercourse</b>                                                          |                                   | <b>10.57%</b> |                                        |                     |                   |             |                                                                 |                     |                   | 0.000        |
|                    | Gross Irrigation water demand in each basin countries [Bm3/yr]                                                 | Direct                            | 1.32%         | 57.07                                  | 13.33               | 0.79              | 71.19       | 0.011                                                           | 0.002               | 0.000             | 0.013        |
|                    | Potential irrigation area in each basin country [Hectare]                                                      | Direct                            | 1.76%         | 820,000                                | 2,234,500           | 9,855,400         | 12,909,900  | 0.001                                                           | 0.003               | 0.013             | 0.018        |
|                    | Existing domestic water demand in each basin countries [Bm3/year]                                              | Direct                            | 1.32%         | 10.20                                  | 2.98                | 0.13              | 13.31       | 0.010                                                           | 0.003               | 0.000             | 0.013        |
|                    | Projected domestic water demand by 2050 in each basin countries [Bm3/year]                                     | Direct                            | 1.76%         | 13.14                                  | 3.10                | 11.43             | 27.67       | 0.008                                                           | 0.002               | 0.007             | 0.018        |
|                    | Energy Consumption per Capita (Kg of oil equivalent per capita)                                                | Direct                            | 1.32%         | 913.06                                 | 342.13              | 410.27            | 1,665.46    | 0.007                                                           | 0.003               | 0.003             | 0.013        |
|                    | Existing Hydropower production in the basin in each country[MW]                                                | Direct                            | 1.32%         | 2,862.00                               | 1,591.60            | 713.00            | 5,166.60    | 0.007                                                           | 0.004               | 0.002             | 0.013        |
|                    | Remaining potential Hydropower production in the basin in each country[MW]                                     | Direct                            | 1.76%         | 40.00                                  | 5,851.40            | 4,651.00          | 10,542.40   | 0.000                                                           | 0.010               | 0.008             | 0.018        |
|                    | <b>Conservation, protection, development and economy of uses and the costs of measures taken</b>               |                                   | <b>8.16%</b>  |                                        |                     |                   |             |                                                                 |                     |                   |              |
| <b>6</b>           | <b>Areas exposed for severe soil erosion in each country with a rate of (&gt;80kg/ha/yr) [Km2]</b>             | Direct                            | 2.04%         | 0.00                                   | 0.00                | 16,875.00         | 16,875.00   | 0.000                                                           | 0.000               | 0.020             | 0.020        |
|                    | Loss of water by evaporation from dams in each basin countries [BCM/year]                                      | Reverse                           | 1.02%         | 12.30                                  | 4.56                | 0.00              | 16.86       | 0.000                                                           | 0.004               | 0.006             | 0.010        |
|                    | Water use efficiency [USD/m3]                                                                                  | Direct                            | 1.02%         | 3.80                                   | 1.60                | 11.56             | 16.96       | 0.002                                                           | 0.001               | 0.007             | 0.010        |
|                    | Wetland area [Km2]                                                                                             | Direct                            | 1.02%         | 426.00                                 | 69,058.30           | 12,624.00         | 82,108.30   | 0.000                                                           | 0.009               | 0.002             | 0.010        |
|                    | Cereal yield (kg per hectare)                                                                                  | Direct                            | 1.02%         | 72,525.00                              | 5,895.00            | 15,671.50         | 94,091.50   | 0.008                                                           | 0.001               | 0.002             | 0.010        |
|                    | Gross investment made on hydraulic structures or Dams [million USD]                                            | Direct                            | 1.02%         | 1.00                                   | 4.38                | 0.88              | 6.27        | 0.002                                                           | 0.007               | 0.001             | 0.010        |
|                    | Total agricultural export value (1000)                                                                         | Reverse                           | 1.02%         | 4,056,931                              | 551,613,000         | 878,435           | 556,548,366 | 0.002                                                           | 0.000               | 0.008             | 0.010        |
| <b>7</b>           | <b>The availability of alternatives, of comparable value</b>                                                   |                                   | <b>3.95%</b>  |                                        |                     |                   |             |                                                                 |                     |                   | 0.000        |
|                    | Alternative energy source from Solar(both PV and CSP) [TWh/year]                                               | Reverse                           | 0.003         | 58,823.00                              | 165,239.00          | 27,573.17         | 251,635.17  | 0.001                                                           | 0.000               | 0.002             | 0.003        |
|                    | Alternative energy source from Wind [TWh/year]                                                                 | Reverse                           | 0.003         | 36,601.00                              | 61,661.00           | 7,320.00          | 105,582.00  | 0.000                                                           | 0.000               | 0.002             | 0.003        |
|                    | Alternative energy source from oil [proved oil reserves in thousand million barrels]                           | Reverse                           | 0.003         | 3.33                                   | 5.00                | 0.00              | 8.33        | 0.001                                                           | 0.000               | 0.002             | 0.003        |
|                    | Alternative energy source from natural gas [proved reserves trillion cubic feet]                               | Reverse                           | 0.003         | 1.78                                   | 0.00                | 0.00              | 1.78        | 0.000                                                           | 0.002               | 0.002             | 0.003        |
|                    | Alternative energy source from generated waste via incineration method                                         | Reverse                           | 0.003         | 287,088.0                              | 107,020.00          | 37,087.00         | 431,195.00  | 0.000                                                           | 0.001               | 0.002             | 0.003        |
|                    | Total Renewable ground water resource[BCM/yr]                                                                  | Reverse                           | 0.003         | 1.50                                   | 3.50                | 83.00             | 88.00       | 0.002                                                           | 0.001               | 0.000             | 0.003        |
|                    | Average income from Tourism [Million US\$]                                                                     | Reverse                           | 0.004         | 6,900.35                               | 527.50              | 902.17            | 8,330.01    | 0.000                                                           | 0.002               | 0.001             | 0.004        |
|                    | Alternative source of food and income from Livestock resource                                                  | -                                 | 0.004         | 0                                      | 0                   | 0                 | 0           |                                                                 |                     |                   | 0.000        |
|                    | - Cattle [Head]                                                                                                | Reverse                           | 0.001         | 5,064,509                              | 21,285,781          | 10,480,925        | 36,831,214  | 0.000                                                           | 0.000               | 0.000             | 0.001        |
|                    | - Sheep [Head]                                                                                                 | Reverse                           | 0.001         | 5,697,716                              | 29,198,500          | 5,043,718         | 39,939,933  | 0.000                                                           | 0.000               | 0.000             | 0.001        |
|                    | - Chicken [1000 Head]                                                                                          | Reverse                           | 0.001         | 156,453                                | 31,650              | 24,672            | 212,775     | 0.000                                                           | 0.000               | 0.000             | 0.001        |
|                    | - Goat [Head]                                                                                                  | Reverse                           | 0.001         | 4,351,545                              | 22,504,212          | 11,158,130        | 38,013,887  | 0.000                                                           | 0.000               | 0.000             | 0.001        |
|                    | - Beehives[No]                                                                                                 | Reverse                           | 0.001         | 877,637                                | 76,095              | 982,531           | 1,936,263   | 0.000                                                           | 0.001               | 0.000             | 0.001        |
|                    | 55 years average fish and aquaculture production [metric ton/yr]                                               | Reverse                           | 0.004         | 732,455.6                              | 37,359.82           | 139,481.89        | 909,297.32  | 0.000                                                           | 0.003               | 0.001             | 0.004        |
|                    | Industry value added (%GDP)- including construction industry                                                   | Reverse                           | 0.004         | 35.08                                  | 11.50               | 22.21             | 68.80       | 0.001                                                           | 0.002               | 0.001             | 0.004        |
|                    | Employment in service provision sector [% of total employment]                                                 | Reverse                           | 0.004         | 48.55                                  | 38.43               | 22.47             | 109.45      | 0.001                                                           | 0.001               | 0.002             | 0.004        |
| <b>Total share</b> |                                                                                                                |                                   |               |                                        |                     |                   |             | <b>0.290</b>                                                    | <b>0.347</b>        | <b>0.362</b>      | <b>1.000</b> |



Table S9: A Summary of Blue Nile Sub- basin Water Entitlement Scenarios and outputs

| Scenario #    | Relevant Factors Weight | Indicators weight | Indicators weight | Fraction of Share |          |        | Total |
|---------------|-------------------------|-------------------|-------------------|-------------------|----------|--------|-------|
|               |                         |                   |                   | Egypt             | Ethiopia | Sudans |       |
| 1             | FAHP                    | Equal             | Equal             | 0.2941            | 0.4146   | 0.2913 | 1.00  |
| 2             | Equal                   | Equal             | Equal             | 0.2920            | 0.4132   | 0.2948 | 1.00  |
| 3             | Sequential Ranking-1    | Equal             | Equal             | 0.2843            | 0.4305   | 0.2852 | 1.00  |
| 4             | Sequential Ranking-2    | Equal             | Equal             | 0.2983            | 0.4369   | 0.2648 | 1.00  |
| 5             | Sequential Ranking-3    | Equal             | Equal             | 0.3209            | 0.4115   | 0.2677 | 1.00  |
| 6             | Sequential Ranking-4    | Equal             | Equal             | 0.2773            | 0.4317   | 0.2910 | 1.00  |
| 7             | Sequential Ranking-5    | Equal             | Equal             | 0.2839            | 0.4104   | 0.3058 | 1.00  |
| 8             | Sequential Ranking-6    | Equal             | Equal             | 0.2695            | 0.4279   | 0.3026 | 1.00  |
| 9             | Sequential Ranking-7    | Equal             | Equal             | 0.2878            | 0.4271   | 0.2852 | 1.00  |
| 10            | Sequential Ranking-8    | Equal             | Equal             | 0.3017            | 0.4341   | 0.2643 | 1.00  |
| 11            | Sequential Ranking-9    | Equal             | Equal             | 0.3256            | 0.4034   | 0.2710 | 1.00  |
| 12            | Sequential Ranking-10   | Equal             | Equal             | 0.2710            | 0.4312   | 0.2978 | 1.00  |
| 13            | Sequential Ranking-11   | Equal             | Equal             | 0.2859            | 0.4030   | 0.3111 | 1.00  |
| 14            | Sequential Ranking-12   | Equal             | Equal             | 0.2681            | 0.4269   | 0.3050 | 1.00  |
| 15            | Sequential Ranking-13   | Equal             | Equal             | 0.2863            | 0.4261   | 0.2876 | 1.00  |
| 16            | Sequential Ranking-14   | Equal             | Equal             | 0.3051            | 0.4307   | 0.2642 | 1.00  |
| 17            | Sequential Ranking-15   | Equal             | Equal             | 0.3289            | 0.4006   | 0.2705 | 1.00  |
| 18            | Sequential Ranking-16   | Equal             | Equal             | 0.2757            | 0.4231   | 0.3012 | 1.00  |
| 19            | Sequential Ranking-17   | Equal             | Equal             | 0.2796            | 0.4025   | 0.3179 | 1.00  |
| 20            | Sequential Ranking-18   | Equal             | Equal             | 0.2701            | 0.4195   | 0.3103 | 1.00  |
| 21            | Sequential Ranking-19   | Equal             | Equal             | 0.2884            | 0.4187   | 0.2929 | 1.00  |
| 22            | Sequential Ranking-20   | Equal             | Equal             | 0.3037            | 0.4297   | 0.2666 | 1.00  |
| 23            | Sequential Ranking-21   | Equal             | Equal             | 0.3324            | 0.3971   | 0.2705 | 1.00  |
| 24            | Sequential Ranking-22   | Equal             | Equal             | 0.2791            | 0.4203   | 0.3007 | 1.00  |
| 25            | Sequential Ranking-23   | Equal             | Equal             | 0.2844            | 0.3943   | 0.3213 | 1.00  |
| 26            | Sequential Ranking-24   | Equal             | Equal             | 0.2639            | 0.4190   | 0.3171 | 1.00  |
| 27            | Sequential Ranking-25   | Equal             | Equal             | 0.2821            | 0.4182   | 0.2997 | 1.00  |
| 28            | Sequential Ranking-26   | Equal             | Equal             | 0.3058            | 0.4223   | 0.2720 | 1.00  |
| 29            | Sequential Ranking-27   | Equal             | Equal             | 0.3310            | 0.3962   | 0.2729 | 1.00  |
| 30            | Sequential Ranking-28   | Equal             | Equal             | 0.2825            | 0.4169   | 0.3006 | 1.00  |
| 31            | Sequential Ranking-29   | Equal             | Equal             | 0.2877            | 0.3915   | 0.3208 | 1.00  |
| 32            | Sequential Ranking-30   | Equal             | Equal             | 0.2686            | 0.4109   | 0.3205 | 1.00  |
| 33            | Sequential Ranking-31   | Equal             | Equal             | 0.2869            | 0.4101   | 0.3031 | 1.00  |
| 34            | Sequential Ranking-32   | Equal             | Equal             | 0.2995            | 0.4218   | 0.2787 | 1.00  |
| 35            | Sequential Ranking-33   | Equal             | Equal             | 0.3330            | 0.3888   | 0.2782 | 1.00  |
| 36            | Sequential Ranking-34   | Equal             | Equal             | 0.2811            | 0.4159   | 0.3030 | 1.00  |
| 37            | Sequential Ranking-35   | Equal             | Equal             | 0.2911            | 0.3881   | 0.3207 | 1.00  |
| 38            | Sequential Ranking-36   | Equal             | Equal             | 0.2719            | 0.4081   | 0.3200 | 1.00  |
| 39            | Sequential Ranking-37   | Equal             | Equal             | 0.2902            | 0.4073   | 0.3025 | 1.00  |
| 40            | Sequential Ranking-38   | Equal             | Equal             | 0.3042            | 0.4137   | 0.2821 | 1.00  |
| 41            | Sequential Ranking-39   | Equal             | Equal             | 0.3267            | 0.3883   | 0.2850 | 1.00  |
| 42            | Sequential Ranking-40   | Equal             | Equal             | 0.2832            | 0.4085   | 0.3084 | 1.00  |
| 43            | Sequential Ranking-41   | Equal             | Equal             | 0.2897            | 0.3872   | 0.3231 | 1.00  |
| 44            | Sequential Ranking-42   | Equal             | Equal             | 0.2754            | 0.4047   | 0.3200 | 1.00  |
| 45            | FAHP                    | FAHP              | Equal             | 0.3018            | 0.4353   | 0.2629 | 1.00  |
| 46            | Equal                   | FAHP              | Equal             | 0.2999            | 0.4288   | 0.2713 | 1.00  |
| 47            | Sequential Ranking-1    | FAHP              | Equal             | 0.2901            | 0.4425   | 0.2675 | 1.00  |
| 48            | Sequential Ranking-2    | FAHP              | Equal             | 0.3051            | 0.4513   | 0.2436 | 1.00  |
| 49            | Sequential Ranking-3    | FAHP              | Equal             | 0.3304            | 0.4166   | 0.2530 | 1.00  |
| 50            | Sequential Ranking-4    | FAHP              | Equal             | 0.2821            | 0.4446   | 0.2732 | 1.00  |
| 51            | Sequential Ranking-5    | FAHP              | Equal             | 0.2913            | 0.4221   | 0.2866 | 1.00  |
| 52            | Sequential Ranking-6    | FAHP              | Equal             | 0.2685            | 0.4456   | 0.2859 | 1.00  |
| 53            | Sequential Ranking-7    | FAHP              | Equal             | 0.2954            | 0.4392   | 0.2654 | 1.00  |
| 54            | Sequential Ranking-8    | FAHP              | Equal             | 0.3094            | 0.4500   | 0.2406 | 1.00  |
| 55            | Sequential Ranking-9    | FAHP              | Equal             | 0.3364            | 0.4081   | 0.2555 | 1.00  |
| 56            | Sequential Ranking-10   | FAHP              | Equal             | 0.2759            | 0.4466   | 0.2776 | 1.00  |
| 57            | Sequential Ranking-11   | FAHP              | Equal             | 0.2946            | 0.4156   | 0.2898 | 1.00  |
| 58            | Sequential Ranking-12   | FAHP              | Equal             | 0.2664            | 0.4468   | 0.2868 | 1.00  |
| 59            | Sequential Ranking-13   | FAHP              | Equal             | 0.2934            | 0.4404   | 0.2663 | 1.00  |
| 60            | Sequential Ranking-14   | FAHP              | Equal             | 0.3147            | 0.4467   | 0.2385 | 1.00  |
| 61            | Sequential Ranking-15   | FAHP              | Equal             | 0.3407            | 0.4068   | 0.2526 | 1.00  |
| 62            | Sequential Ranking-16   | FAHP              | Equal             | 0.2818            | 0.4380   | 0.2802 | 1.00  |
| 63            | Sequential Ranking-17   | FAHP              | Equal             | 0.2883            | 0.4175   | 0.2942 | 1.00  |
| 64            | Sequential Ranking-18   | FAHP              | Equal             | 0.2697            | 0.4402   | 0.2901 | 1.00  |
| 65            | Sequential Ranking-19   | FAHP              | Equal             | 0.2967            | 0.4338   | 0.2695 | 1.00  |
| 66            | Sequential Ranking-20   | FAHP              | Equal             | 0.3127            | 0.4479   | 0.2394 | 1.00  |
| 67            | Sequential Ranking-21   | FAHP              | Equal             | 0.3460            | 0.4035   | 0.2505 | 1.00  |
| 68            | Sequential Ranking-22   | FAHP              | Equal             | 0.2861            | 0.4367   | 0.2772 | 1.00  |
| 69            | Sequential Ranking-23   | FAHP              | Equal             | 0.2943            | 0.4090   | 0.2967 | 1.00  |
| 70            | Sequential Ranking-24   | FAHP              | Equal             | 0.2634            | 0.4422   | 0.2944 | 1.00  |
| 71            | Sequential Ranking-25   | FAHP              | Equal             | 0.2904            | 0.4358   | 0.2739 | 1.00  |
| 72            | Sequential Ranking-26   | FAHP              | Equal             | 0.3160            | 0.4413   | 0.2427 | 1.00  |
| 73            | Sequential Ranking-27   | FAHP              | Equal             | 0.3440            | 0.4047   | 0.2514 | 1.00  |
| 74            | Sequential Ranking-28   | FAHP              | Equal             | 0.2915            | 0.4334   | 0.2751 | 1.00  |
| 75            | Sequential Ranking-29   | FAHP              | Equal             | 0.2986            | 0.4077   | 0.2937 | 1.00  |
| 76            | Sequential Ranking-30   | FAHP              | Equal             | 0.2694            | 0.4336   | 0.2970 | 1.00  |
| 77            | Sequential Ranking-31   | FAHP              | Equal             | 0.2964            | 0.4272   | 0.2764 | 1.00  |
| 78            | Sequential Ranking-32   | FAHP              | Equal             | 0.3097            | 0.4433   | 0.2470 | 1.00  |
| 79            | Sequential Ranking-33   | FAHP              | Equal             | 0.3473            | 0.3981   | 0.2546 | 1.00  |
| 80            | Sequential Ranking-34   | FAHP              | Equal             | 0.2894            | 0.4346   | 0.2760 | 1.00  |
| 81            | Sequential Ranking-35   | FAHP              | Equal             | 0.3039            | 0.4044   | 0.2916 | 1.00  |
| 82            | Sequential Ranking-36   | FAHP              | Equal             | 0.2737            | 0.4323   | 0.2940 | 1.00  |
| 83            | Sequential Ranking-37   | FAHP              | Equal             | 0.3006            | 0.4259   | 0.2734 | 1.00  |
| 84            | Sequential Ranking-38   | FAHP              | Equal             | 0.3157            | 0.4347   | 0.2496 | 1.00  |
| 85            | Sequential Ranking-39   | FAHP              | Equal             | 0.3410            | 0.4001   | 0.2590 | 1.00  |
| 86            | Sequential Ranking-40   | FAHP              | Equal             | 0.2927            | 0.4281   | 0.2792 | 1.00  |
| 87            | Sequential Ranking-41   | FAHP              | Equal             | 0.3019            | 0.4056   | 0.2925 | 1.00  |
| 88            | Sequential Ranking-42   | FAHP              | Equal             | 0.2790            | 0.4290   | 0.2919 | 1.00  |
| Minimum Share |                         |                   |                   | 0.2634            | 0.3872   | 0.2385 |       |
| Maximum Share |                         |                   |                   | 0.3473            | 0.4513   | 0.3231 |       |

Table S10: A Summary of Baro-akobo-Sobat Sub- basin Water Entitlement Scenarios and outputs

| Scenario #    | Relevant Factors weighting method | Sub-factors Weighting method | Indicators Weighting method | Fraction of share |          |       |       |
|---------------|-----------------------------------|------------------------------|-----------------------------|-------------------|----------|-------|-------|
|               |                                   |                              |                             | Sudan & South     |          |       | Total |
|               |                                   |                              |                             | Egypt             | Ethiopia | Sudan |       |
| 1             | FAHP                              | Equal                        | Equal                       | 0.314             | 0.402    | 0.284 | 1.000 |
| 2             | Equal                             | Equal                        | Equal                       | 0.308             | 0.405    | 0.287 | 1.000 |
| 3             | Sequential Ranking-1              | Equal                        | Equal                       | 0.299             | 0.422    | 0.279 | 1.000 |
| 4             | Sequential Ranking-2              | Equal                        | Equal                       | 0.310             | 0.425    | 0.264 | 1.000 |
| 5             | Sequential Ranking-3              | Equal                        | Equal                       | 0.329             | 0.400    | 0.271 | 1.000 |
| 6             | Sequential Ranking-4              | Equal                        | Equal                       | 0.293             | 0.432    | 0.275 | 1.000 |
| 7             | Sequential Ranking-5              | Equal                        | Equal                       | 0.303             | 0.409    | 0.289 | 1.000 |
| 8             | Sequential Ranking-6              | Equal                        | Equal                       | 0.281             | 0.416    | 0.303 | 1.000 |
| 9             | Sequential Ranking-7              | Equal                        | Equal                       | 0.304             | 0.419    | 0.277 | 1.000 |
| 10            | Sequential Ranking-8              | Equal                        | Equal                       | 0.314             | 0.422    | 0.264 | 1.000 |
| 11            | Sequential Ranking-9              | Equal                        | Equal                       | 0.334             | 0.391    | 0.275 | 1.000 |
| 12            | Sequential Ranking-10             | Equal                        | Equal                       | 0.289             | 0.433    | 0.278 | 1.000 |
| 13            | Sequential Ranking-11             | Equal                        | Equal                       | 0.306             | 0.401    | 0.293 | 1.000 |
| 14            | Sequential Ranking-12             | Equal                        | Equal                       | 0.279             | 0.413    | 0.308 | 1.000 |
| 15            | Sequential Ranking-13             | Equal                        | Equal                       | 0.302             | 0.416    | 0.282 | 1.000 |
| 16            | Sequential Ranking-14             | Equal                        | Equal                       | 0.319             | 0.419    | 0.263 | 1.000 |
| 17            | Sequential Ranking-15             | Equal                        | Equal                       | 0.338             | 0.388    | 0.275 | 1.000 |
| 18            | Sequential Ranking-16             | Equal                        | Equal                       | 0.294             | 0.424    | 0.281 | 1.000 |
| 19            | Sequential Ranking-17             | Equal                        | Equal                       | 0.302             | 0.402    | 0.296 | 1.000 |
| 20            | Sequential Ranking-18             | Equal                        | Equal                       | 0.282             | 0.405    | 0.312 | 1.000 |
| 21            | Sequential Ranking-19             | Equal                        | Equal                       | 0.305             | 0.408    | 0.286 | 1.000 |
| 22            | Sequential Ranking-20             | Equal                        | Equal                       | 0.317             | 0.416    | 0.268 | 1.000 |
| 23            | Sequential Ranking-21             | Equal                        | Equal                       | 0.343             | 0.384    | 0.273 | 1.000 |
| 24            | Sequential Ranking-22             | Equal                        | Equal                       | 0.298             | 0.421    | 0.281 | 1.000 |
| 25            | Sequential Ranking-23             | Equal                        | Equal                       | 0.307             | 0.394    | 0.300 | 1.000 |
| 26            | Sequential Ranking-24             | Equal                        | Equal                       | 0.278             | 0.407    | 0.315 | 1.000 |
| 27            | Sequential Ranking-25             | Equal                        | Equal                       | 0.301             | 0.410    | 0.289 | 1.000 |
| 28            | Sequential Ranking-26             | Equal                        | Equal                       | 0.320             | 0.408    | 0.272 | 1.000 |
| 29            | Sequential Ranking-27             | Equal                        | Equal                       | 0.341             | 0.382    | 0.278 | 1.000 |
| 30            | Sequential Ranking-28             | Equal                        | Equal                       | 0.302             | 0.418    | 0.280 | 1.000 |
| 31            | Sequential Ranking-29             | Equal                        | Equal                       | 0.310             | 0.390    | 0.300 | 1.000 |
| 32            | Sequential Ranking-30             | Equal                        | Equal                       | 0.283             | 0.398    | 0.319 | 1.000 |
| 33            | Sequential Ranking-31             | Equal                        | Equal                       | 0.306             | 0.401    | 0.293 | 1.000 |
| 34            | Sequential Ranking-32             | Equal                        | Equal                       | 0.316             | 0.409    | 0.275 | 1.000 |
| 35            | Sequential Ranking-33             | Equal                        | Equal                       | 0.344             | 0.374    | 0.282 | 1.000 |
| 36            | Sequential Ranking-34             | Equal                        | Equal                       | 0.300             | 0.415    | 0.285 | 1.000 |
| 37            | Sequential Ranking-35             | Equal                        | Equal                       | 0.315             | 0.387    | 0.298 | 1.000 |
| 38            | Sequential Ranking-36             | Equal                        | Equal                       | 0.286             | 0.395    | 0.319 | 1.000 |
| 39            | Sequential Ranking-37             | Equal                        | Equal                       | 0.309             | 0.398    | 0.293 | 1.000 |
| 40            | Sequential Ranking-38             | Equal                        | Equal                       | 0.321             | 0.401    | 0.279 | 1.000 |
| 41            | Sequential Ranking-39             | Equal                        | Equal                       | 0.340             | 0.375    | 0.285 | 1.000 |
| 42            | Sequential Ranking-40             | Equal                        | Equal                       | 0.304             | 0.407    | 0.289 | 1.000 |
| 43            | Sequential Ranking-41             | Equal                        | Equal                       | 0.313             | 0.384    | 0.303 | 1.000 |
| 44            | Sequential Ranking-42             | Equal                        | Equal                       | 0.291             | 0.392    | 0.317 | 1.000 |
| 45            | FAHP                              | FAHP                         | Equal                       | 0.312             | 0.425    | 0.264 | 1.000 |
| 46            | Equal                             | FAHP                         | Equal                       | 0.312             | 0.418    | 0.270 | 1.000 |
| 47            | Sequential Ranking-1              | FAHP                         | Equal                       | 0.302             | 0.430    | 0.268 | 1.000 |
| 48            | Sequential Ranking-2              | FAHP                         | Equal                       | 0.313             | 0.435    | 0.252 | 1.000 |
| 49            | Sequential Ranking-3              | FAHP                         | Equal                       | 0.337             | 0.403    | 0.260 | 1.000 |
| 50            | Sequential Ranking-4              | FAHP                         | Equal                       | 0.297             | 0.440    | 0.263 | 1.000 |
| 51            | Sequential Ranking-5              | FAHP                         | Equal                       | 0.308             | 0.415    | 0.277 | 1.000 |
| 52            | Sequential Ranking-6              | FAHP                         | Equal                       | 0.277             | 0.430    | 0.294 | 1.000 |
| 53            | Sequential Ranking-7              | FAHP                         | Equal                       | 0.308             | 0.428    | 0.264 | 1.000 |
| 54            | Sequential Ranking-8              | FAHP                         | Equal                       | 0.317             | 0.433    | 0.250 | 1.000 |
| 55            | Sequential Ranking-9              | FAHP                         | Equal                       | 0.343             | 0.395    | 0.262 | 1.000 |
| 56            | Sequential Ranking-10             | FAHP                         | Equal                       | 0.292             | 0.443    | 0.264 | 1.000 |
| 57            | Sequential Ranking-11             | FAHP                         | Equal                       | 0.313             | 0.408    | 0.279 | 1.000 |
| 58            | Sequential Ranking-12             | FAHP                         | Equal                       | 0.274             | 0.429    | 0.297 | 1.000 |
| 59            | Sequential Ranking-13             | FAHP                         | Equal                       | 0.305             | 0.428    | 0.268 | 1.000 |
| 60            | Sequential Ranking-14             | FAHP                         | Equal                       | 0.324             | 0.431    | 0.246 | 1.000 |
| 61            | Sequential Ranking-15             | FAHP                         | Equal                       | 0.347             | 0.393    | 0.259 | 1.000 |
| 62            | Sequential Ranking-16             | FAHP                         | Equal                       | 0.298             | 0.436    | 0.266 | 1.000 |
| 63            | Sequential Ranking-17             | FAHP                         | Equal                       | 0.308             | 0.412    | 0.280 | 1.000 |
| 64            | Sequential Ranking-18             | FAHP                         | Equal                       | 0.278             | 0.423    | 0.300 | 1.000 |
| 65            | Sequential Ranking-19             | FAHP                         | Equal                       | 0.309             | 0.421    | 0.270 | 1.000 |
| 66            | Sequential Ranking-20             | FAHP                         | Equal                       | 0.321             | 0.430    | 0.249 | 1.000 |
| 67            | Sequential Ranking-21             | FAHP                         | Equal                       | 0.354             | 0.391    | 0.256 | 1.000 |
| 68            | Sequential Ranking-22             | FAHP                         | Equal                       | 0.303             | 0.434    | 0.264 | 1.000 |
| 69            | Sequential Ranking-23             | FAHP                         | Equal                       | 0.314             | 0.404    | 0.282 | 1.000 |
| 70            | Sequential Ranking-24             | FAHP                         | Equal                       | 0.273             | 0.426    | 0.301 | 1.000 |
| 71            | Sequential Ranking-25             | FAHP                         | Equal                       | 0.304             | 0.425    | 0.271 | 1.000 |
| 72            | Sequential Ranking-26             | FAHP                         | Equal                       | 0.325             | 0.424    | 0.252 | 1.000 |
| 73            | Sequential Ranking-27             | FAHP                         | Equal                       | 0.351             | 0.391    | 0.259 | 1.000 |
| 74            | Sequential Ranking-28             | FAHP                         | Equal                       | 0.309             | 0.431    | 0.260 | 1.000 |
| 75            | Sequential Ranking-29             | FAHP                         | Equal                       | 0.318             | 0.402    | 0.280 | 1.000 |
| 76            | Sequential Ranking-30             | FAHP                         | Equal                       | 0.279             | 0.418    | 0.302 | 1.000 |
| 77            | Sequential Ranking-31             | FAHP                         | Equal                       | 0.310             | 0.417    | 0.273 | 1.000 |
| 78            | Sequential Ranking-32             | FAHP                         | Equal                       | 0.320             | 0.427    | 0.253 | 1.000 |
| 79            | Sequential Ranking-33             | FAHP                         | Equal                       | 0.355             | 0.384    | 0.262 | 1.000 |
| 80            | Sequential Ranking-34             | FAHP                         | Equal                       | 0.306             | 0.431    | 0.263 | 1.000 |
| 81            | Sequential Ranking-35             | FAHP                         | Equal                       | 0.324             | 0.399    | 0.276 | 1.000 |
| 82            | Sequential Ranking-36             | FAHP                         | Equal                       | 0.283             | 0.416    | 0.300 | 1.000 |
| 83            | Sequential Ranking-37             | FAHP                         | Equal                       | 0.314             | 0.415    | 0.271 | 1.000 |
| 84            | Sequential Ranking-38             | FAHP                         | Equal                       | 0.326             | 0.419    | 0.255 | 1.000 |
| 85            | Sequential Ranking-39             | FAHP                         | Equal                       | 0.350             | 0.387    | 0.263 | 1.000 |
| 86            | Sequential Ranking-40             | FAHP                         | Equal                       | 0.310             | 0.424    | 0.266 | 1.000 |
| 87            | Sequential Ranking-41             | FAHP                         | Equal                       | 0.321             | 0.399    | 0.280 | 1.000 |
| 88            | Sequential Ranking-42             | FAHP                         | Equal                       | 0.290             | 0.414    | 0.296 | 1.000 |
| Minimum Share |                                   |                              |                             | 0.273             | 0.374    | 0.246 |       |
| Maximum Share |                                   |                              |                             | 0.355             | 0.443    | 0.319 |       |

Table S11: A Summary of Tekeze-Atbara Sub- basin Water Entitlement Scenarios and Outputs

| Scenario      | Relevant Factors weighting method | Sub-factors Weighting method | Indicators Weighting method | Fraction of Share |          |        | Total |
|---------------|-----------------------------------|------------------------------|-----------------------------|-------------------|----------|--------|-------|
|               |                                   |                              |                             | Egypt             | Ethiopia | Sudans |       |
| 1             | FAHP                              | Equal                        | Equal                       | 0.305             | 0.396    | 0.299  | 1.000 |
| 2             | Equal                             | Equal                        | Equal                       | 0.297             | 0.395    | 0.308  | 1.000 |
| 3             | Sequential Ranking-1              | Equal                        | Equal                       | 0.287             | 0.415    | 0.298  | 1.000 |
| 4             | Sequential Ranking-2              | Equal                        | Equal                       | 0.305             | 0.408    | 0.287  | 1.000 |
| 5             | Sequential Ranking-3              | Equal                        | Equal                       | 0.327             | 0.377    | 0.296  | 1.000 |
| 6             | Sequential Ranking-4              | Equal                        | Equal                       | 0.282             | 0.418    | 0.299  | 1.000 |
| 7             | Sequential Ranking-5              | Equal                        | Equal                       | 0.290             | 0.393    | 0.318  | 1.000 |
| 8             | Sequential Ranking-6              | Equal                        | Equal                       | 0.271             | 0.418    | 0.311  | 1.000 |
| 9             | Sequential Ranking-7              | Equal                        | Equal                       | 0.291             | 0.411    | 0.298  | 1.000 |
| 10            | Sequential Ranking-8              | Equal                        | Equal                       | 0.309             | 0.404    | 0.288  | 1.000 |
| 11            | Sequential Ranking-9              | Equal                        | Equal                       | 0.332             | 0.368    | 0.300  | 1.000 |
| 12            | Sequential Ranking-10             | Equal                        | Equal                       | 0.276             | 0.422    | 0.302  | 1.000 |
| 13            | Sequential Ranking-11             | Equal                        | Equal                       | 0.292             | 0.385    | 0.323  | 1.000 |
| 14            | Sequential Ranking-12             | Equal                        | Equal                       | 0.269             | 0.419    | 0.312  | 1.000 |
| 15            | Sequential Ranking-13             | Equal                        | Equal                       | 0.289             | 0.412    | 0.299  | 1.000 |
| 16            | Sequential Ranking-14             | Equal                        | Equal                       | 0.313             | 0.400    | 0.288  | 1.000 |
| 17            | Sequential Ranking-15             | Equal                        | Equal                       | 0.336             | 0.364    | 0.300  | 1.000 |
| 18            | Sequential Ranking-16             | Equal                        | Equal                       | 0.281             | 0.413    | 0.306  | 1.000 |
| 19            | Sequential Ranking-17             | Equal                        | Equal                       | 0.286             | 0.388    | 0.326  | 1.000 |
| 20            | Sequential Ranking-18             | Equal                        | Equal                       | 0.271             | 0.411    | 0.318  | 1.000 |
| 21            | Sequential Ranking-19             | Equal                        | Equal                       | 0.291             | 0.404    | 0.304  | 1.000 |
| 22            | Sequential Ranking-20             | Equal                        | Equal                       | 0.311             | 0.401    | 0.289  | 1.000 |
| 23            | Sequential Ranking-21             | Equal                        | Equal                       | 0.340             | 0.360    | 0.300  | 1.000 |
| 24            | Sequential Ranking-22             | Equal                        | Equal                       | 0.285             | 0.409    | 0.306  | 1.000 |
| 25            | Sequential Ranking-23             | Equal                        | Equal                       | 0.291             | 0.380    | 0.329  | 1.000 |
| 26            | Sequential Ranking-24             | Equal                        | Equal                       | 0.265             | 0.415    | 0.320  | 1.000 |
| 27            | Sequential Ranking-25             | Equal                        | Equal                       | 0.285             | 0.408    | 0.307  | 1.000 |
| 28            | Sequential Ranking-26             | Equal                        | Equal                       | 0.313             | 0.393    | 0.294  | 1.000 |
| 29            | Sequential Ranking-27             | Equal                        | Equal                       | 0.338             | 0.361    | 0.301  | 1.000 |
| 30            | Sequential Ranking-28             | Equal                        | Equal                       | 0.289             | 0.405    | 0.306  | 1.000 |
| 31            | Sequential Ranking-29             | Equal                        | Equal                       | 0.295             | 0.375    | 0.330  | 1.000 |
| 32            | Sequential Ranking-30             | Equal                        | Equal                       | 0.270             | 0.406    | 0.324  | 1.000 |
| 33            | Sequential Ranking-31             | Equal                        | Equal                       | 0.290             | 0.399    | 0.310  | 1.000 |
| 34            | Sequential Ranking-32             | Equal                        | Equal                       | 0.307             | 0.397    | 0.296  | 1.000 |
| 35            | Sequential Ranking-33             | Equal                        | Equal                       | 0.340             | 0.353    | 0.307  | 1.000 |
| 36            | Sequential Ranking-34             | Equal                        | Equal                       | 0.287             | 0.406    | 0.307  | 1.000 |
| 37            | Sequential Ranking-35             | Equal                        | Equal                       | 0.299             | 0.372    | 0.330  | 1.000 |
| 38            | Sequential Ranking-36             | Equal                        | Equal                       | 0.274             | 0.402    | 0.324  | 1.000 |
| 39            | Sequential Ranking-37             | Equal                        | Equal                       | 0.294             | 0.395    | 0.311  | 1.000 |
| 40            | Sequential Ranking-38             | Equal                        | Equal                       | 0.312             | 0.388    | 0.300  | 1.000 |
| 41            | Sequential Ranking-39             | Equal                        | Equal                       | 0.334             | 0.357    | 0.309  | 1.000 |
| 42            | Sequential Ranking-40             | Equal                        | Equal                       | 0.289             | 0.398    | 0.312  | 1.000 |
| 43            | Sequential Ranking-41             | Equal                        | Equal                       | 0.297             | 0.373    | 0.331  | 1.000 |
| 44            | Sequential Ranking-42             | Equal                        | Equal                       | 0.278             | 0.398    | 0.324  | 1.000 |
| 45            | FAHP                              | FAHP                         | Equal                       | 0.307             | 0.418    | 0.275  | 1.000 |
| 46            | Equal                             | FAHP                         | Equal                       | 0.305             | 0.411    | 0.284  | 1.000 |
| 47            | Sequential Ranking-1              | FAHP                         | Equal                       | 0.293             | 0.428    | 0.279  | 1.000 |
| 48            | Sequential Ranking-2              | FAHP                         | Equal                       | 0.312             | 0.424    | 0.264  | 1.000 |
| 49            | Sequential Ranking-3              | FAHP                         | Equal                       | 0.336             | 0.385    | 0.279  | 1.000 |
| 50            | Sequential Ranking-4              | FAHP                         | Equal                       | 0.287             | 0.431    | 0.282  | 1.000 |
| 51            | Sequential Ranking-5              | FAHP                         | Equal                       | 0.297             | 0.404    | 0.298  | 1.000 |
| 52            | Sequential Ranking-6              | FAHP                         | Equal                       | 0.270             | 0.435    | 0.294  | 1.000 |
| 53            | Sequential Ranking-7              | FAHP                         | Equal                       | 0.298             | 0.425    | 0.277  | 1.000 |
| 54            | Sequential Ranking-8              | FAHP                         | Equal                       | 0.316             | 0.421    | 0.263  | 1.000 |
| 55            | Sequential Ranking-9              | FAHP                         | Equal                       | 0.342             | 0.376    | 0.282  | 1.000 |
| 56            | Sequential Ranking-10             | FAHP                         | Equal                       | 0.281             | 0.437    | 0.283  | 1.000 |
| 57            | Sequential Ranking-11             | FAHP                         | Equal                       | 0.301             | 0.398    | 0.302  | 1.000 |
| 58            | Sequential Ranking-12             | FAHP                         | Equal                       | 0.268             | 0.438    | 0.294  | 1.000 |
| 59            | Sequential Ranking-13             | FAHP                         | Equal                       | 0.296             | 0.428    | 0.277  | 1.000 |
| 60            | Sequential Ranking-14             | FAHP                         | Equal                       | 0.322             | 0.418    | 0.260  | 1.000 |
| 61            | Sequential Ranking-15             | FAHP                         | Equal                       | 0.347             | 0.373    | 0.280  | 1.000 |
| 62            | Sequential Ranking-16             | FAHP                         | Equal                       | 0.287             | 0.428    | 0.286  | 1.000 |
| 63            | Sequential Ranking-17             | FAHP                         | Equal                       | 0.294             | 0.403    | 0.303  | 1.000 |
| 64            | Sequential Ranking-18             | FAHP                         | Equal                       | 0.271             | 0.431    | 0.298  | 1.000 |
| 65            | Sequential Ranking-19             | FAHP                         | Equal                       | 0.299             | 0.421    | 0.280  | 1.000 |
| 66            | Sequential Ranking-20             | FAHP                         | Equal                       | 0.319             | 0.421    | 0.260  | 1.000 |
| 67            | Sequential Ranking-21             | FAHP                         | Equal                       | 0.353             | 0.370    | 0.278  | 1.000 |
| 68            | Sequential Ranking-22             | FAHP                         | Equal                       | 0.292             | 0.425    | 0.284  | 1.000 |
| 69            | Sequential Ranking-23             | FAHP                         | Equal                       | 0.300             | 0.394    | 0.305  | 1.000 |
| 70            | Sequential Ranking-24             | FAHP                         | Equal                       | 0.265             | 0.437    | 0.299  | 1.000 |
| 71            | Sequential Ranking-25             | FAHP                         | Equal                       | 0.293             | 0.426    | 0.281  | 1.000 |
| 72            | Sequential Ranking-26             | FAHP                         | Equal                       | 0.323             | 0.414    | 0.264  | 1.000 |
| 73            | Sequential Ranking-27             | FAHP                         | Equal                       | 0.350             | 0.373    | 0.278  | 1.000 |
| 74            | Sequential Ranking-28             | FAHP                         | Equal                       | 0.297             | 0.421    | 0.282  | 1.000 |
| 75            | Sequential Ranking-29             | FAHP                         | Equal                       | 0.305             | 0.391    | 0.304  | 1.000 |
| 76            | Sequential Ranking-30             | FAHP                         | Equal                       | 0.271             | 0.428    | 0.302  | 1.000 |
| 77            | Sequential Ranking-31             | FAHP                         | Equal                       | 0.299             | 0.418    | 0.284  | 1.000 |
| 78            | Sequential Ranking-32             | FAHP                         | Equal                       | 0.316             | 0.419    | 0.265  | 1.000 |
| 79            | Sequential Ranking-33             | FAHP                         | Equal                       | 0.353             | 0.366    | 0.281  | 1.000 |
| 80            | Sequential Ranking-34             | FAHP                         | Equal                       | 0.294             | 0.424    | 0.281  | 1.000 |
| 81            | Sequential Ranking-35             | FAHP                         | Equal                       | 0.310             | 0.388    | 0.302  | 1.000 |
| 82            | Sequential Ranking-36             | FAHP                         | Equal                       | 0.275             | 0.425    | 0.300  | 1.000 |
| 83            | Sequential Ranking-37             | FAHP                         | Equal                       | 0.303             | 0.415    | 0.282  | 1.000 |
| 84            | Sequential Ranking-38             | FAHP                         | Equal                       | 0.322             | 0.410    | 0.268  | 1.000 |
| 85            | Sequential Ranking-39             | FAHP                         | Equal                       | 0.347             | 0.371    | 0.282  | 1.000 |
| 86            | Sequential Ranking-40             | FAHP                         | Equal                       | 0.298             | 0.417    | 0.285  | 1.000 |
| 87            | Sequential Ranking-41             | FAHP                         | Equal                       | 0.308             | 0.391    | 0.301  | 1.000 |
| 88            | Sequential Ranking-42             | FAHP                         | Equal                       | 0.281             | 0.421    | 0.298  | 1.000 |
| Minimum Share |                                   |                              |                             | 0.2647            | 0.3534   | 0.2603 |       |
| Maximum Share |                                   |                              |                             | 0.3534            | 0.4379   | 0.3306 |       |

Table S12: A Summary of White Nile Sub- basin Water Entitlement Weight Scenarios and Outputs

| Scenario #    | Relevant Factors Weight | Sub-factors weighting method | Indicators weighting method | Fraction of Share |                 |                   | Total |
|---------------|-------------------------|------------------------------|-----------------------------|-------------------|-----------------|-------------------|-------|
|               |                         |                              |                             | Egypt             | Sudan & S.Sudan | Equatorial States |       |
| 1             | FAHP                    | Equal                        | Equal                       | 0.2904            | 0.3472          | 0.3621            | 1.000 |
| 2             | Equal                   | Equal                        | Equal                       | 0.2843            | 0.3229          | 0.3915            | 0.999 |
| 3             | Sequential Ranking-1    | Equal                        | Equal                       | 0.2689            | 0.3133          | 0.4156            | 0.998 |
| 4             | Sequential Ranking-2    | Equal                        | Equal                       | 0.2849            | 0.3061          | 0.4083            | 0.999 |
| 5             | Sequential Ranking-3    | Equal                        | Equal                       | 0.3088            | 0.3180          | 0.3722            | 0.999 |
| 6             | Sequential Ranking-4    | Equal                        | Equal                       | 0.2777            | 0.3311          | 0.3900            | 0.999 |
| 7             | Sequential Ranking-5    | Equal                        | Equal                       | 0.2831            | 0.3074          | 0.4079            | 0.998 |
| 8             | Sequential Ranking-6    | Equal                        | Equal                       | 0.2572            | 0.3323          | 0.4085            | 0.998 |
| 9             | Sequential Ranking-7    | Equal                        | Equal                       | 0.2722            | 0.3117          | 0.4138            | 0.998 |
| 10            | Sequential Ranking-8    | Equal                        | Equal                       | 0.2890            | 0.3065          | 0.4042            | 1.000 |
| 11            | Sequential Ranking-9    | Equal                        | Equal                       | 0.3142            | 0.3216          | 0.3632            | 0.999 |
| 12            | Sequential Ranking-10   | Equal                        | Equal                       | 0.2739            | 0.3348          | 0.3900            | 0.999 |
| 13            | Sequential Ranking-11   | Equal                        | Equal                       | 0.2854            | 0.3050          | 0.4079            | 0.998 |
| 14            | Sequential Ranking-12   | Equal                        | Equal                       | 0.2543            | 0.3381          | 0.4056            | 0.998 |
| 15            | Sequential Ranking-13   | Equal                        | Equal                       | 0.2693            | 0.3175          | 0.4109            | 0.998 |
| 16            | Sequential Ranking-14   | Equal                        | Equal                       | 0.2924            | 0.3049          | 0.4024            | 1.000 |
| 17            | Sequential Ranking-15   | Equal                        | Equal                       | 0.3183            | 0.3221          | 0.3590            | 0.999 |
| 18            | Sequential Ranking-16   | Equal                        | Equal                       | 0.2793            | 0.3385          | 0.3810            | 0.999 |
| 19            | Sequential Ranking-17   | Equal                        | Equal                       | 0.2817            | 0.3088          | 0.4079            | 0.998 |
| 20            | Sequential Ranking-18   | Equal                        | Equal                       | 0.2566            | 0.3358          | 0.4056            | 0.998 |
| 21            | Sequential Ranking-19   | Equal                        | Equal                       | 0.2717            | 0.3151          | 0.4109            | 0.998 |
| 22            | Sequential Ranking-20   | Equal                        | Equal                       | 0.2895            | 0.3107          | 0.3995            | 1.000 |
| 23            | Sequential Ranking-21   | Equal                        | Equal                       | 0.3217            | 0.3205          | 0.3572            | 0.999 |
| 24            | Sequential Ranking-22   | Equal                        | Equal                       | 0.2834            | 0.3389          | 0.3768            | 0.999 |
| 25            | Sequential Ranking-23   | Equal                        | Equal                       | 0.2871            | 0.3124          | 0.3989            | 0.998 |
| 26            | Sequential Ranking-24   | Equal                        | Equal                       | 0.2528            | 0.3396          | 0.4056            | 0.998 |
| 27            | Sequential Ranking-25   | Equal                        | Equal                       | 0.2679            | 0.3189          | 0.4109            | 0.998 |
| 28            | Sequential Ranking-26   | Equal                        | Equal                       | 0.2918            | 0.3084          | 0.3995            | 1.000 |
| 29            | Sequential Ranking-27   | Equal                        | Equal                       | 0.3188            | 0.3263          | 0.3543            | 0.999 |
| 30            | Sequential Ranking-28   | Equal                        | Equal                       | 0.2867            | 0.3373          | 0.3750            | 0.999 |
| 31            | Sequential Ranking-29   | Equal                        | Equal                       | 0.2911            | 0.3129          | 0.3947            | 0.999 |
| 32            | Sequential Ranking-30   | Equal                        | Equal                       | 0.2582            | 0.3432          | 0.3966            | 0.998 |
| 33            | Sequential Ranking-31   | Equal                        | Equal                       | 0.2733            | 0.3226          | 0.4019            | 0.998 |
| 34            | Sequential Ranking-32   | Equal                        | Equal                       | 0.2880            | 0.3122          | 0.3995            | 1.000 |
| 35            | Sequential Ranking-33   | Equal                        | Equal                       | 0.3211            | 0.3240          | 0.3543            | 0.999 |
| 36            | Sequential Ranking-34   | Equal                        | Equal                       | 0.2838            | 0.3431          | 0.3721            | 0.999 |
| 37            | Sequential Ranking-35   | Equal                        | Equal                       | 0.2945            | 0.3113          | 0.3929            | 0.999 |
| 38            | Sequential Ranking-36   | Equal                        | Equal                       | 0.2623            | 0.3436          | 0.3924            | 0.998 |
| 39            | Sequential Ranking-37   | Equal                        | Equal                       | 0.2773            | 0.3230          | 0.3977            | 0.998 |
| 40            | Sequential Ranking-38   | Equal                        | Equal                       | 0.2934            | 0.3158          | 0.3905            | 1.000 |
| 41            | Sequential Ranking-39   | Equal                        | Equal                       | 0.3173            | 0.3278          | 0.3543            | 0.999 |
| 42            | Sequential Ranking-40   | Equal                        | Equal                       | 0.2861            | 0.3408          | 0.3721            | 0.999 |
| 43            | Sequential Ranking-41   | Equal                        | Equal                       | 0.2916            | 0.3171          | 0.3900            | 0.999 |
| 44            | Sequential Ranking-42   | Equal                        | Equal                       | 0.2657            | 0.3421          | 0.3906            | 0.998 |
| 45            | FAHP                    | FAHP                         | Equal                       | 0.3065            | 0.3218          | 0.3718            | 1.000 |
| 46            | Equal                   | FAHP                         | Equal                       | 0.2985            | 0.3038          | 0.3977            | 1.000 |
| 47            | Sequential Ranking-1    | FAHP                         | Equal                       | 0.2781            | 0.3021          | 0.4198            | 1.000 |
| 48            | Sequential Ranking-2    | FAHP                         | Equal                       | 0.2952            | 0.2925          | 0.4123            | 1.000 |
| 49            | Sequential Ranking-3    | FAHP                         | Equal                       | 0.3240            | 0.3092          | 0.3668            | 1.000 |
| 50            | Sequential Ranking-4    | FAHP                         | Equal                       | 0.2871            | 0.3212          | 0.3917            | 1.000 |
| 51            | Sequential Ranking-5    | FAHP                         | Equal                       | 0.2954            | 0.2951          | 0.4096            | 1.000 |
| 52            | Sequential Ranking-6    | FAHP                         | Equal                       | 0.2585            | 0.3224          | 0.4191            | 1.000 |
| 53            | Sequential Ranking-7    | FAHP                         | Equal                       | 0.2843            | 0.2976          | 0.4181            | 1.000 |
| 54            | Sequential Ranking-8    | FAHP                         | Equal                       | 0.3010            | 0.2898          | 0.4092            | 1.000 |
| 55            | Sequential Ranking-9    | FAHP                         | Equal                       | 0.3317            | 0.3109          | 0.3574            | 1.000 |
| 56            | Sequential Ranking-10   | FAHP                         | Equal                       | 0.2839            | 0.3221          | 0.3940            | 1.000 |
| 57            | Sequential Ranking-11   | FAHP                         | Equal                       | 0.2996            | 0.2896          | 0.4107            | 1.000 |
| 58            | Sequential Ranking-12   | FAHP                         | Equal                       | 0.2553            | 0.3259          | 0.4188            | 1.000 |
| 59            | Sequential Ranking-13   | FAHP                         | Equal                       | 0.2811            | 0.3010          | 0.4179            | 1.000 |
| 60            | Sequential Ranking-14   | FAHP                         | Equal                       | 0.3071            | 0.2853          | 0.4075            | 1.000 |
| 61            | Sequential Ranking-15   | FAHP                         | Equal                       | 0.3375            | 0.3082          | 0.3543            | 1.000 |
| 62            | Sequential Ranking-16   | FAHP                         | Equal                       | 0.2916            | 0.3238          | 0.3846            | 1.000 |
| 63            | Sequential Ranking-17   | FAHP                         | Equal                       | 0.2964            | 0.2905          | 0.4131            | 1.000 |
| 64            | Sequential Ranking-18   | FAHP                         | Equal                       | 0.2596            | 0.3204          | 0.4200            | 1.000 |
| 65            | Sequential Ranking-19   | FAHP                         | Equal                       | 0.2854            | 0.2956          | 0.4190            | 1.000 |
| 66            | Sequential Ranking-20   | FAHP                         | Equal                       | 0.3039            | 0.2888          | 0.4073            | 1.000 |
| 67            | Sequential Ranking-21   | FAHP                         | Equal                       | 0.3437            | 0.3037          | 0.3526            | 1.000 |
| 68            | Sequential Ranking-22   | FAHP                         | Equal                       | 0.2974            | 0.3211          | 0.3815            | 1.000 |
| 69            | Sequential Ranking-23   | FAHP                         | Equal                       | 0.3041            | 0.2922          | 0.4036            | 1.000 |
| 70            | Sequential Ranking-24   | FAHP                         | Equal                       | 0.2564            | 0.3213          | 0.4223            | 1.000 |
| 71            | Sequential Ranking-25   | FAHP                         | Equal                       | 0.2822            | 0.2965          | 0.4213            | 1.000 |
| 72            | Sequential Ranking-26   | FAHP                         | Equal                       | 0.3082            | 0.2833          | 0.4084            | 1.000 |
| 73            | Sequential Ranking-27   | FAHP                         | Equal                       | 0.3405            | 0.3072          | 0.3523            | 1.000 |
| 74            | Sequential Ranking-28   | FAHP                         | Equal                       | 0.3036            | 0.3167          | 0.3798            | 1.000 |
| 75            | Sequential Ranking-29   | FAHP                         | Equal                       | 0.3099            | 0.2895          | 0.4006            | 1.000 |
| 76            | Sequential Ranking-30   | FAHP                         | Equal                       | 0.2641            | 0.3230          | 0.4129            | 1.000 |
| 77            | Sequential Ranking-31   | FAHP                         | Equal                       | 0.2899            | 0.2982          | 0.4119            | 1.000 |
| 78            | Sequential Ranking-32   | FAHP                         | Equal                       | 0.3050            | 0.2842          | 0.4108            | 1.000 |
| 79            | Sequential Ranking-33   | FAHP                         | Equal                       | 0.3448            | 0.3017          | 0.3535            | 1.000 |
| 80            | Sequential Ranking-34   | FAHP                         | Equal                       | 0.3004            | 0.3201          | 0.3795            | 1.000 |
| 81            | Sequential Ranking-35   | FAHP                         | Equal                       | 0.3161            | 0.2850          | 0.3989            | 1.000 |
| 82            | Sequential Ranking-36   | FAHP                         | Equal                       | 0.2699            | 0.3203          | 0.4098            | 1.000 |
| 83            | Sequential Ranking-37   | FAHP                         | Equal                       | 0.2957            | 0.2955          | 0.4089            | 1.000 |
| 84            | Sequential Ranking-38   | FAHP                         | Equal                       | 0.3127            | 0.2859          | 0.4013            | 1.000 |
| 85            | Sequential Ranking-39   | FAHP                         | Equal                       | 0.3415            | 0.3026          | 0.3558            | 1.000 |
| 86            | Sequential Ranking-40   | FAHP                         | Equal                       | 0.3047            | 0.3147          | 0.3807            | 1.000 |
| 87            | Sequential Ranking-41   | FAHP                         | Equal                       | 0.3129            | 0.2885          | 0.3986            | 1.000 |
| 88            | Sequential Ranking-42   | FAHP                         | Equal                       | 0.2761            | 0.3158          | 0.4081            | 1.000 |
| Minimum Share |                         |                              |                             | 0.2528            | 0.2833          | 0.3523            |       |
| Maximum Share |                         |                              |                             | 0.3448            | 0.3472          | 0.4223            |       |
